# Supplementary material for: Urinary Analysis of Fluid Retention in the General Population: A Cross-Sectional Study
Source: PLoS One. 2016 Oct 20;11(10):e0164152. doi: 10.1371/journal.pone.0164152 (PMC5072703; doi:10.1371/journal.pone.0164152)
Supplement: S1 Table — English Version. (XLS) [file pone.0164152.s001.xls]

## Sheet: data
		S1 Table	Original data
	Nr	Gender (M=male)	Age	Length(cm)	Body weight (kg)	Last water intake (h)	Last water intake (day)	Urine sample delivered (h)	Urine sample delivered (day)	Urine color	U-osmolality	U-sodium	U-potassium	U-glucose	U-bilirubin	Corrected U-bilirubin	Ketones (mmol/L)	Reported ketones (mmol/L)	U-specific gravity	Reported U-spec gravity	Blood Ery/microL	Reportede Blood Ery/microL	pH	Protein g/L	Protein g/L	Urobilinogen µmol/L	Nitrite	Leucocytes	Albumin mg/L	Reported albumin mg/L	Creatinine mmol/L	Albumin/creatinine ratio mg/mmol	Reported albumin/creatinine ratio	Serum osmolality (mosmol/kg)	Plasma sodium	Plasma potassium	Plasma calcium	Serum cortisol (nmol/L)	Serum vasopressin (pg/ml)	Reported serum vasopressin	Serum aldosterone	Serum renin	First day of last menstruation (day)	Diseases (morbidity)	Drugs	Notes
	1	K	55	165	55	1899-12-31 05:30:00	2014-10-21	1899-12-31 07:05:00	2014-10-21	2	807	86	60	0	0	0	0	0	>=1,030	1.03	0	0	5.5	0	0	3.2	0	15	9.3	9.3	11	0.8	0.8	296	142	4.6	2.52	340	<1,5	1.5	166	10	-	-	-	-
	2	K	49	168	90	1899-12-31 05:00:00	2014-10-21	1899-12-31 06:30:00	2014-10-21	2	648	85	47	0	0	0	0	0	1.025	1.025	80	80	5.5	0	0	3.2	0	15	10.8	10.8	11	1	1	286	140	4.2	2.4	399	<1,5	1.5	463	24	2014-10-07	-	Levaxin	-
	3	K	32	186	63	1899-12-31 06:15:00	2014-10-21	1899-12-31 07:15:00	2014-10-21	3	1089	95	56	0	0	0	0	0	>=1,030	1.03	0	0	5.5	0	0	3.2	0	0	12.2	12.2	20	0.6	0.6	297	144	4.4	2.43	227	<1,5	1.5	457	28	2014-09-14	-	-	-
	4	K	47	167	89	1899-12-31 21:00:00	2014-10-20	1899-12-31 05:30:00	2014-10-21	1	644	88	25	0	0	0	0	0	1.025	1.025	0	0	6	0	0	3.2	0	0	<5,0	5	9.4	<0,5	0.5	292	144	4.6	2.44	184	<1,5	1.5	228	11	-	-	-	-
	5	K	-	164	78	1899-12-31 20:00:00	2014-10-20	1899-12-31 06:00:00	2014-10-21	1	544	93	9	0	0	0	0	0	1.02	1.02	80	80	6	0	0	3.2	0	0	<5,0	5	6.7	<0,7	0.7	303	140	4.6	2.35	642	<1,5	1.5	143	15	2014-10-01	diabetes type 1	Insulin	-
	6	K	-	168	72	1899-12-31 06:10:00	2014-10-21	1899-12-31 07:45:00	2014-10-21	4	855	119	85	0	0	0	trace	0	1.025	1.025	0	0	6	0	0	3.2	0	0	6.4	6.4	13.6	0.5	0.5	296	143	4.3	2.46	403	<1,5	1.5	274	16	2014-10-11	-	-	flocculation in the urine sample
	7	K	37	167	80	1899-12-31 21:00:00	2014-10-20	1899-12-31 07:30:00	2014-10-21	2	791	151	69	0	0	0	0	0	1.02	1.02	0	0	7	0	0	3.2	0	500	<5,0	5	10.4	<0,5	0.5	294	144	4.5	2.41	535	<1,5	1.5	216	12	2014-09-24	-	-	flocculation in the urine sample
	8	K	65	161	60	1899-12-31 07:00:00	2014-10-21	1899-12-31 07:50:00	2014-10-21	1	168	13	15	0	0	0	0	0	1.01	1.01	Spår - intakt	0	7	0	0	3.2	0	0	<5,0	5	3.9	<1,3	1.3	287	139	4	2.32	396	<1,5	1.5	325	2.4	-	temporalis arteritis, heart fibrillation, hypertension	Prednisolon, Pradaxa, Seloken	-
	9	K	-	162	62	1899-12-31 05:40:00	2014-10-21	1899-12-31 07:55:00	2014-10-21	2	642	81	130	0	0	0	0	0	1.02	1.02	0	0	7	0	0	3.2	0	0	5.2	5.2	9.1	0.6	0.6	293	141	4.8	2.43	285	<1,5	1.5	516	14	-	-	-	-
	10	K	65	162	71	1899-12-31 06:25:00	2014-10-21	1899-12-31 07:35:00	2014-10-21	2	560	121	43	0	0	0	0	0	1.02	1.02	0	0	6	0	0	3.2	0	0	6.3	6.3	9.9	0.6	0.6	291	140	4.1	2.37	351	<1,5	1.5	248	8.9	-	hypothyreosis	Levaxin	-
	11	k	21	161	60	1899-12-31 07:00:00	2014-10-21	1899-12-31 08:15:00	2014-10-21	4	960	97	80	0	0	0	trace	0	>=1,030	1.03	0	0	5.5	0.3	0.3	3.2	0	0	22.2	22.2	26.6	0.8	0.8	285	138	3.4	2.31	377	<1,5	1.5	366	46	2014-09-09	-	-	-
	12	k	-	163	66	1899-12-31 07:30:00	2014-10-21	1899-12-31 08:15:00	2014-10-21	4	863	98	72	0	0	0	0	0	>=1,030	1.03	0	0	5.5	0	0	3.2	0	0	13	13	26.3	0.5	0.5	293	139	3.9	2.35	303	<1,5	1.5	545	17	2014-10-03	-	folic acid	-
	13	k	34	163	52	1899-12-31 08:00:00	2014-10-21	1899-12-31 08:20:00	2014-10-21	2	758	116	119	0	0	0	0	0	1.02	1.02	0	0	7	0	0	3.2	0	0	5.7	5.7	10.3	0.6	0.6	288	142	4.3	2.4	286	<1,5	1.5	173	26	hormone intrauterine coil			-
	14	k	24	176	71	1899-12-31 07:30:00	2014-10-21	1899-12-31 08:00:00	2014-10-21	1	604	107	53	0	0	0	0	0	1.02	1.02	0	0	6	0	0	3.2	0	0	<5,0	5	10.2	<0,5	0.5	294	140	4.6	2.34	476	<1,5	1.5	264	26	2014-09-24	-	-	-
	15	k	48	167	70	1899-12-31 07:30:00	2014-10-21	1899-12-31 08:30:00	2014-10-21	3	567	72	52	0	0	0	0	0	1.02	1.02	spår-intakt	0	5.5	0	0	3.2	0	15	13.4	13.4	10.2	1.3	1.3	293	141	4.1	2.32	290	<1,5	1.5	160	12	hormone intrauterine coil	-		-
	16	k	40	169	57	1899-12-31 07:45:00	2014-10-21	1899-12-31 08:15:00	2014-10-21	2	649	142	62	0	0	0	0	0	1.02	1.02	25	25	7	0	0	3.2	0	15	<5,0	5	7.8	<0,6	0.6	290	138	4.5	2.39	422	<1,5	1.5	481	16	-	-	-	-
	17	k	34	172	62	1899-12-31 07:45:00	2014-10-21	1899-12-31 08:15:00	2014-10-21	1	321	65	35	0	0	0	0	0	1.01	1.01	0	0	6.5	0	0	3.2	0	0	<5,0	5	2.7	<1,9	1.9	294	140	4.3	2.33	379	<1,5	1.5	220	19	2014-10-06	-	-	-
	18	k	36	168	71	1899-12-31 21:00:00	2014-10-20	1899-12-31 08:25:00	2014-10-21	3	991	180	97	0	0	0	0	0	>=1,030	1.03	80	80	5.5	0	0	3.2	0	0	13.9	13.9	18.2	0.8	0.8	289	138	4.2	2.32	326	<1,5	1.5	134	21	2014-10-12	-	-	-
	19	k	28	162	76	1899-12-31 08:40:00	2014-10-21	1899-12-31 08:50:00	2014-10-21	4	699	53	84	0	0	0	0	0	1.025	1.025	0	0	5.5	0	0	3.2	0	0	17.2	17.2	25	0.7	0.7	292	138	4.3	2.34	390	<1,5	1.5	769	61	2014-10-12	ear inflammation	penicillin	-
	20	k	61	171	73	1899-12-31 09:00:00	2014-10-21	1899-12-31 09:00:00	2014-10-21	4	690	89	89	0	0	0	0	0	1.02	1.02	0	0	6.5	0	0	3.2	1	70	10.6	10.6	11.6	0.9	0.9	299	141	5	2.54	333	<1,5	1.5	184	6.5	2008	osteopenia	fosamax, kalciuopos D forte, divisun	-
	21	k	36	165	80	1899-12-31 08:30:00	2014-10-21	1899-12-31 09:45:00	2014-10-21	4	894	162	88	0	0	0	0	0	>=1,030	1.03	spår-intakt	0	5.5	0	0	3.2	0	0	5.5	5.5	12.6	0.4	0.4	299	143	4.2	2.37	328	<1,5	1.5	235	22	2014-10-17	-	citalopram, vitamin B	-
	22	k	59	172	62	1899-12-31 06:30:00	2014-10-21	1899-12-31 09:50:00	2014-10-21	3	860	69	52	0	0	0	0	0	>=1,030	1.03	0	0	5.5	0	0	3.2	0	0	8.7	8.7	15.1	0.6	0.6	299	138	4.7	2.32	425	<1,5	1.5	274	23	-	-	-	-
	23	M	50	167	69	1899-12-31 08:50:00	2014-10-21	1899-12-31 10:00:00	2014-10-21	1	180	35	16	0	0	0	0	0	1.01	1.01	0	0	7	0	0	3.2	0	0	<5,0	5	3.1	<1,6	1.6	294	143	4.2	2.39	296	<1,5	1.5	168	20	-	-	-	-
	24	K	46	164	75	1899-12-31 09:00:00	2014-10-21	1899-12-31 10:00:00	2014-10-21	2	620	127	47	0	0	0	0	0	1.02	1.02	0	0	5	0	0	3.2	0	0	<5,0	5	8.1	<0,6	0.6	299	141	4.1	2.3	130	<1,5	1.5	352	36	2014-10-04	esophagitis	omeprazol	-
	25	K	30	168	57	1899-12-31 10:00:00	2014-10-21	1899-12-31 10:00:00	2014-10-21	3	665	111	66	0	0	0	0	0	1.02	1.02	0	0	6	trace	0	3.2	0	0	85.1	85.1	9.7	8.8	8.8	297	139	4.1	2.45	619	<1,5	1.5	917	19	2014-10-19	-	yasmin	-
	26	M	37	181	75	1899-12-31 08:00:00	2014-10-21	1899-12-31 10:00:00	2014-10-21	4	878	93	68	0	0	0	0	0	1.025	1.025	0	0	6	0	0	3.2	0	0	13	13	21.4	0.6	0.6	300	141	4.1	2.45	294	<1,5	1.5	314	54	-	psoriasis	betnovat	-
	27	K	39	168	60	1899-12-31 07:45:00	2014-10-21	1899-12-31 10:10:00	2014-10-21	1	138	26	8	0	0	0	0	0	<=1,005	1.005	0	0	6	0	0	3.2	0	0	<5,0	5	2.6	<1,9	1.9	295	142	4.3	2.39	850	<1,5	1.5	717	16	-	-	yas	-
	28	M	28	170	59	1899-12-31 08:15:00	2014-10-21	1899-12-31 10:25:00	2014-10-21	1	207	34	25	0	0	0	0	0	1.01	1.01	0	0	7	0	0	3.2	0	0	<5,0	5	2.9	<1,8	1.8	293	140	3.8	2.51	306	<1,5	1.5	190	37	-	-	-	-
	29	K	44	158	60	1899-12-31 10:30:00	2014-10-21	1899-12-31 11:00:00	2014-10-21	1	286	71	27	0	0	0	0	0	1.01	1.01	spår-lyserat	0	6	0	0	3.2	0	15	<5,0	5	1.9	<2,6	2.6	288	138	3.9	2.47	122	<1,5	1.5	163	7.3	2014-09-30	shoulder pain, migraine	sumaputran, alvedon, tradolan	-
	30	K	57	165	80	1899-12-31 08:15:00	2014-10-21	1899-12-31 10:30:00	2014-10-21	3	940	152	69	0	0	0	0	0	>1,030	1.03	0	0	5.5	0	0	3.2	0	0	<5,0	5	14.3	<0,3	0.3	293	140	4.3	2.34	204	<1,5	1.5	229	13	-	-	citalopram	-
	31	K	-	163	60	1899-12-31 10:30:00	2014-10-21	1899-12-31 11:20:00	2014-10-21	2	560	73	74	0	0	0	0	0	1.015	1.015	0	0	6	0	0	3.2	0	0	<5,0	5	7.2	<0,7	0.7	295	137	4.2	2.29	361	<1,5	1.5	636	25	2014-09-29	pollen allergy	Nasonex v.b	-
	32	K	29	168	60	1899-12-31 09:00:00	2014-10-21	1899-12-31 11:30:00	2014-10-21	3	1046	158	92	0	0	0	0	0	>=1,030	1.03	0	0	5.5	0	0	3.2	0	15	5.8	5.8	16.5	0.4	0.4	293	139	4.4	2.43	215	<1,5	1.5	219	12	hormone intrauterine coil	rheumatism as a child	-	-
	33	K	43	169	58.5	1899-12-31 09:00:00	2014-10-21	1899-12-31 11:00:00	2014-10-21	2	919	143	121	0	0	0	0	0	1.02	1.02	0	0	7	0	0	3.2	0	0	9	9	12.2	0.7	0.7	294	140	4	2.31	203	<1,5	1.5	128	16	2014-10-11	hypothyreosis	Levaxin	-
	34	K	-	160	62	1899-12-31 10:30:00	2014-10-21	1899-12-31 11:22:00	2014-10-21	4	872	-	-	0	0	0	0	0	>=1,030	1.03	80	0	5.5	0	0	3.2	0	0	9.6	9.6	22.5	0.4	0.4	296	141	3.7	2.35	313	<1,5	1.5	107	13	2014-10-20	-	-	-
	35	K	53	170	81.2	1899-12-31 08:15:00	2014-10-21	1899-12-31 11:15:00	2014-10-21	2	643	131	82	0	0	0	0	0	1.02	1.02	Spår - intakt	0	7	0	0	3.2	0	0	<5,0	5	6.9	<0,7	0.7	295	140	4.4	2.36	252	<1,5	1.5	364	24	> 2 månader	-	-	-
	36	K	24	164	62	1899-12-31 09:00:00	2014-10-21	1899-12-31 11:00:00	2014-10-21	2	977	196	107	0	0	0	0	0	1.02	1.02	0	0	8	Trace	0	3.2	0	0	19.7	19.7	11.7	1.7	1.7	288	138	4.3	2.45	568	<1,5	1.5	286	24	2014-10-17	-	oral contraceptive	-
	37	K	47	160	50	1899-12-31 10:00:00	2014-10-21	1899-12-31 11:40:00	2014-10-21	1	168	<10	10	0	0	0	0	0	1.01	1.01	Spår - intakt	0	6	0	0	3.2	0	0	<5,0	5	3.3	<1,5	1.5	294	138	3.8	2.51	507	<1,5	1.5	291	13	no menstruation	rheurmatoid arthritis	Levaxin, Folacin, Methotrexate	-
	38	K	44	165	80	1899-12-31 08:30:00	2014-10-21	1899-12-31 11:45:00	2014-10-21	3	988	114	99	0	0	0	0	0	1.025	1.025	0	0	5.5	0	0	3.2	0	70	11	11	16.9	0.7	0.7	295	141	4.2	2.33	262	<1,5	1.5	120	14	hormone intrauterine coil	asthmna	Symbicort vid behov	flocculation in the urine sample
	39	K	40	160	83	1899-12-31 08:43:00	2014-10-21	1899-12-31 11:30:00	2014-10-21	2	593	102	54	0	0	0	0	0	1.02	1.02	80	80	5.5	0	0	3.2	0	0	9	9	8.1	1.1	1.1	296	139	4.1	2.51	486	<1,5	1.5	314	33	2014-10-15	-	-	flocculation in the urine sample
	40	M	52	185	92	1899-12-31 12:30:00	2014-10-22	1899-12-31 14:50:00	2014-10-22	3	812	173	84	0	0	0	0	0	>=1,030	1.03	0	0	6	0	0	3.2	0	0	<5,0	5	11.7	<0,4	0.4	296	140	4.1	2.4	209	<1,5	1.5	153	18	-	-	-	-
	41	M	41	191	112	1899-12-31 21:00:00	2014-10-22	1899-12-31 06:00:00	2014-10-23	3	601	127	12	0	0	0	0	0	1.02	1.02	0	0	5.5	0	0	3.2	0	0	<5,0	5	9.2	<0,5	0.5	297	140	4	2.34	354	<1,5	1.5	138	9.5	-	hepatitis (autoimmune)	Entocir, ursofalk, azathioprin, risenronat	-
	42	M	24	176	65	1899-12-31 23:45:00	2014-10-22	1899-12-31 06:45:00	2014-10-23	2	601	92	16	0	0	0	0	0	1.02	1.02	0	0	5.5	0	0	3.2	0	0	<5,0	5	12.3	<0,4	0.4	290	139	3.8	2.41	530	<1,5	1.5	412	59	-	-	-	-
	43	M	28	-	75	1899-12-31 23:00:00	2014-10-22	1899-12-31 06:30:00	2014-10-23	4	1131	213	57	0	0	0	0	0	>=1,030	1.03	0	0	5.5	0	0	3.2	0	0	5.4	5.4	28.8	0.2	0.2	300	140	4.1	2.36	584	<1,5	1.5	195	44	-	-	-	-
	44	M	53	191	82	1899-12-31 00:30:00	2014-10-23	1899-12-31 05:50:00	2014-10-23	4	1081	191	86	0	0	0	1.5	1.5	>=1,030	1.03	0	0	6	Trace	0	3.2	0	0	9.5	9.5	22.9	0.4	0.4	300	138	3.7	2.31	558	<1,5	1.5	178	21	-	-	-	-
	45	M	53	174	87	1899-12-31 01:00:00	2014-10-23	1899-12-31 05:20:00	2014-10-23	1	272	56	18	0	0	0	0	0	1.01	1.01	0	0	6.5	0	0	3.2	0	0	<5,0	5	4.3	<1,2	1.2	295	139	4.3	2.54	660	<1,5	1.5	466	25	-	-	-	-
	46	M	31	177	80	1899-12-31 06:45:00	2014-10-28	1899-12-31 08:00:00	2014-10-28	3	943	81	64	0	0	0	0	0	>=1,030	1.03	0	0	5.5	0	0	3.2	0	0	12.1	12.1	24.7	0.5	0.5	292	142	4.2	2.31	541	<1,5	1.5	408	32	-	-	-	-
	47	M	28	178	75	1899-12-31 06:50:00	2014-10-30	1899-12-31 08:00:00	2014-10-30	4	663	124	68	0	0	0	0	0	1.02	1.02	0	0	7	0	0	3.2	0	0	<5,0	5	13.8	<0,4	0.4	294	140	4.2	2.29	297	<1,5	1.5	727	35	-	-	-	-
	48	M	37	178	80	1899-12-31 08:30:00	2014-10-23	1899-12-31 11:10:00	2014-10-23	4	1080	192	77	0	0	0	0	0	1.025	1.025	0	0	6.5	0	0	3.2	0	0	9	9	21.9	0.4	0.4	295	140	4.1	2.44	322	<1,5	1.5	173	19	-	-	-	-
	49	M	31	184	90	1899-12-31 06:45:00	2014-10-28	1899-12-31 08:10:00	2014-10-28	2	663	124	68	0	0	0	0	0	1.02	1.02	0	0	7	0	0	3.2	0	0	<5,0	5	13.8	<0,4	0.4	294	140	4.2	2.29	297	<1,5	1.5	418	46	-	-	-	-
	50	M	60	179	80	1899-12-31 20:00:00	2014-10-22	1899-12-31 08:35:00	2014-10-23	4	751	126	103	0	0	0	0	0	1.02	1.02	25	25	7	0	0	3.2	0	0	8.6	8.6	17.3	0.5	0.5	294	138	4.1	2.36	410	<1,5	1.5	193	18	-	-	Levaxin	-
	551	M	37	181	78	1899-12-31 09:30:00	2014-10-28	1899-12-31 11:40:00	2014-10-28	1	743	115	72	0	0		0	0	1.02		0	0	7	0	0	3.2	0	0	9.5	9.5	10.5	0.9	0.9	292	382	144	5	2.58	<1,5	1.5	295	36	-	-	-	-
	51	M	55	181	92	1899-12-31 23:00:00	2014-10-19	1899-12-31 07:00:00	2014-10-20	1	808	144	88	0	0	0	0	0	>=1,030	1.03	0	0	6.5	0	0	3.2	0	0	5.7	5.7	18.6	0.3	0.3	-	-	-	-	-	-		-	-	-	-	-	-
	52	M	49	157	47	1899-12-31 05:00:00	2014-10-20	1899-12-31 09:55:00	2014-10-20	3	1007	225	74	0	0	0	0	0	>=1,030	1.03	0	0	5.5	0	0	3.2	0	0	5.7	5.7	11.8	0.5	0.5	-	-	-	-	-	-		-	-	-	-	-	flocculation in the urine sample
	53	K	33	169	97	1899-12-31 23:30:00	2014-10-19	1899-12-31 09:00:00	2014-10-20	2	851	109	68	0	0	0	0	0	1.025	1.025	0	0	5.5	Spår	0	3.2	0	0	80.7	80.7	22.5	3.6	3.6	-	-	-	-	-	-		-	-	-	-	oral contraceptive	flocculation in the urine sample
	54	K	42	165	71	1899-12-31 06:30:00	2014-10-20	1899-12-31 09:00:00	2014-10-20	1	529	74	76	0	0	0	0	0	1.015	1.015	0	0	7.5	0	0	3.2	0	0	<5,0	5	4.6	<1,1	1.1	-	-	-	-	-	-		-	-	2014-10-08	-	-	-
	55	K	69	164	74	1899-12-31 05:30:00	2014-10-20	1899-12-31 09:25:00	2014-10-20	3	734	106	76	0	0	0	0	0	>=1,030	1.03	0	0	5.5	0	0	3.2	0	0	5.4	5.4	14.7	0.4	0.4	-	-	-	-	-	-		-	-	-	-	-	-
	56	K	53	167	63	1899-12-31 07:30:00	2014-10-20	1899-12-31 09:30:00	2014-10-20	1	179	30	19	0	0	0	0	0	1.01	1.01	Spår - lyserat	0	7	0	0	3.2	0	0	<5,0	5	2.2	<2,3	2.3	-	-	-	-	-	-		-	-	-	-	-	-
	57	K	56	155	59	1899-12-31 07:00:00	2014-10-20	1899-12-31 10:30:00	2014-10-20	2	676	54	54	0	0	0	0	0	1.025	1.025	0	0	5.5	0	0	3.2	0	0	<5,0	5	9.5	<0,5	0.5	-	-	-	-	-	-		-	-	-	-	-	-
	58	K	64	162	62	1899-12-31 05:40:00	2014-10-20	1899-12-31 08:20:00	2014-10-20	2	670	103	77	0	0	0	0	0	1.025	1.025	0	0	5.5	0	0	3.2	0	15	6.2	6.2	9.8	0.6	0.6	-	-	-	-	-	-		-	-	-	-	-	-
	59	K	38	169	72	1899-12-31 06:15:00	2014-10-20	1899-12-31 07:45:00	2014-10-20	2	357	45	30	0	0	0	0	0	1.015	1.015	Spår - intakt	0	6.5	0	0	3.2	0	0	5.2	5.2	6.7	0.8	0.8	-	-	-	-	-	-		-	-	2014-10-11		-	-
	60	K	-	174	72	1899-12-31 08:00:00	2014-10-20	1899-12-31 09:20:00	2014-10-20	1	217	38	29	0	0	0	0	0	<=1,005	1.005	0	0	5.5	0	0	3.2	0	70	<5,0	5	1.9	<2,8	2.8	-	-	-	-	-	-		-	-	-	-	-	-
	61	K	30	171	82	1899-12-31 06:30:00	2014-10-20	1899-12-31 10:20:00	2014-10-20	4	920	130	74	0	0	0	0	0	>=1,030	1.03	0	0	6.5	0	0	3.2	0	0	9.3	9.3	19.8	0.5	0.5	-	-	-	-	-	-		-	-	2014-07-10	polycoistic ovarian diserase	-	-
	62	K	63	164	83	1899-12-31 06:00:00	2014-10-20	1899-12-31 08:00:00	2014-10-20	1	416	72	51	0	0	0	0	0	1.015	1.015	0	0	6	0	0	3.2	0	15	6.1	6.1	9.4	0.6	0.6	-	-	-	-	-	-		-	-	-	-	Anaztosol, omeprazol	-
	63	K	-	161	60	1899-12-31 07:30:00	2014-10-20	1899-12-31 09:00:00	2014-10-20	1	176	22	15	0	0	0	0	0	1.01	1.01	0	0	7	0	0	3.2	0	0	<5,0	5	2.9	<1,7	1.7	-	-	-	-	-	-		-	-	-	atrial fibrillation, hypertension, temporalis arteritis	Prednisolon, Pradaxa, Seloken	-
	64	K	-	163	78	1899-12-31 08:00:00	2014-10-20	1899-12-31 10:30:00	2014-10-20	1	581	79	87	0	0	0	0	0	1.02	1.02	0	0	7	0	0	3.2	0	0	<5,0	5	7.5	<0,7	0.7	-	-	-	-	-	-		-	-	-	Depression	Venlafaxin Ranbaxy	-
	65	K	32	172	63	1899-12-31 08:15:00	2014-10-20	1899-12-31 10:35:00	2014-10-20	3	782	144	107	0	0	0	0	0	1.025	1.025	200	200	7	0.3	0.3	3.2	0	0	36.9	36.9	9.9	3.7	3.7	-	-	-	-	-	-		-	-	2014-10-18	-	-	-
	66	K	49	152	54	1899-12-31 04:45:00	2014-10-20	1899-12-31 08:00:00	2014-10-20	3	405	48	22	0	0	0	Spår	0	1.015	1.015	0	0	6	0	0	3.2	0	0	7.7	7.7	7.6	1	1	-	-	-	-	-	-		-	-	none	arthrosis	Behepan, Kalcie-chew, Omeprazol	-
	67	K	53	179	80	1899-12-31 07:30:00	2014-10-20	1899-12-31 09:30:00	2014-10-20	4	708	52	88	0	0	0	Spår	0	1.025	1.025	0	0	5.5	Spår	0	3.2	0	0	22.8	22.8	17.6	1.3	1.3	-	-	-	-	-	-		-	-	-	psoriasis arteritis, hypertension	Metraproxath, folsyra, amlodpin, seloken	-
	68	K	45	175	71	1899-12-31 06:30:00	2014-10-20	1899-12-31 09:20:00	2014-10-20	1	374	40	41	0	0	0	0	0	1.015	1.015	0	0	5.5	0	0	3.2	0	0	<5,0	5	6.6	<0,8	0.8	-	-	-	-	-	-		-	-	-	-	-	-
	69	K	37	167	80	1899-12-31 08:30:00	2014-10-20	1899-12-31 10:45:00	2014-10-20	1	329	47	26	0	0	0	0	0	1.01	1.01	0	0	6	0	0	3.2	0	15	<5,0	5	4.8	<1,0	1	-	-	-	-	-	-		-	-	2014-09-25	-	-	-
	70	K	-	154	43.9	1899-12-31 09:00:00	2014-10-20	1899-12-31 10:45:00	2014-10-20	1	253	58	11	0	0	0	0	0	1.015	1.015	Spår - intakt	0	7	0	0	3.2	0	70	<5,0	5	2.1	<2,4	2.4	-	-	-	-	-	-		-	-	2014-09-24	-	Behepan, niferex	-
	71	K	-	162	62	1899-12-31 10:00:00	2014-10-20	1899-12-31 10:45:00	2014-10-20	2	936	105	69	0	0	0	0	0	>=1,030	1.03	0	0	5.5	0	0	3.2	0	0	16.2	16.2	19.9	0.8	0.8	-	-	-	-	-	-		-	-	2012	rheumatism	-	flocculation in the urine sample
	72	K	61	171	73	1899-12-31 06:00:00	2014-10-20	1899-12-31 09:30:00	2014-10-20	3	776	98	101	0	0	0	0	0	1.025	1.025	0	0	6.5	Spår	0	3.2	0	15	8.6	8.6	10.6	0.8	0.8	-	-	-	-	-	-		-	-	2008	osteopenia/osteoporosis	Fosamax, divisun, calciopos, D-forte	-
	73	K	21	160	57	1899-12-31 07:30:00	2014-10-20	1899-12-31 11:00:00	2014-10-20	3	1113	79	125	5.5	0	0	0	0	>=1,030	1.03	0	0	5.5	0.3	0.3	3.2	0	0	21.3	21.3	26.3	0.8	0.8	-	-	-	-	-	-		-	-	2014-09-09	-	-	flocculation in the urine sample
	74	K	25	162	66	1899-12-31 08:00:00	2014-10-20	1899-12-31 11:00:00	2014-10-20	2	1105	163	83	0	0	0	0	0	>=1,030	1.03	0	0	5.5	0	0	3.2	0	0	8.7	8.7	17.8	0.5	0.5	-	-	-	-	-	-		-	-	2014-10-03	-	Folsyra	flocculation in the urine sample
	75	K	34	168	73	1899-12-31 08:15:00	2014-10-20	1899-12-31 11:00:00	2014-10-20	2	957	89	83	0	0	0	0	0	>=1,030	1.03	0	0	5	0	0	3.2	0	0	6.7	6.7	15.7	0.4	0.4	-	-	-	-	-	-		-	-	2014-10-10	-	-	-
	76	K	34	163	51	1899-12-31 05:30:00	2014-10-20	1899-12-31 07:35:00	2014-10-20	4	957	59	104	0	0	0	0	0	>=1,030	1.03	0	0	5.5	Spår	0	3.2	0	0	13.7	13.7	21.4	0.6	0.6	-	-	-	-	-	-		-	-	hormone intrauterine coil	-	-	-
	77	K	36	178	72	1899-12-31 07:00:00	2014-10-20	1899-12-31 11:15:00	2014-10-20	4	839	88	62	0	0	0	Spår	0	1.025	1.025	0	0	6	0	0	3.2	0	0	5.6	5.6	16.9	0.3	0.3	-	-	-	-	-	-		-	-	end of september 2014	-	-	-
	78	K	42	163	87	1899-12-31 05:25:00	2014-10-20	1899-12-31 07:30:00	2014-10-20	2	961	156	55	0	0	0	0	0	>=1,030	1.03	0	0	6	0	0	3.2	0	0	8.5	8.5	14	0.6	0.6	-	-	-	-	-	-		-	-	2014-10-06	mild asthma	-	flocculation in the urine sample
	79	K	49	160	60	1899-12-31 09:30:00	2014-10-21	1899-12-31 11:30:00	2014-10-21	2	786	95	69	0	0	0	0	0	>=1,030	1.03	0	0	6	0	0	3.2	0	0	6	6	14.9	0.4	0.4	-	-	-	-	-	-		-	-	-	-	-	-
	80	K	45	170	77	1899-12-31 10:30:00	2014-10-20	1899-12-31 11:30:00	2014-10-20	3	650	18	104	0	0	0	0	0	1.02	1.02	Spår- intakt	0	6.5	0	0	3.2	0	0	9.5	9.5	14.6	0.7	0.7	-	-	-	-	-	-		-	-	2014-10-14	psoriasis arteritis	-	-
	81	K	41	176	73	1899-12-31 08:00:00	2014-10-20	1899-12-31 11:45:00	2014-10-20	1	560	143	41	0	0	0	0	0	1.02	1.02	Spår-lyserat	0	7	0	0	3.2	0	70	5.8	5.8	10.8	0.5	0.5	-	-	-	-	-	-		-	-	hormone intrauterine coil	-	-	-
	82	K	-	157	60	1899-12-31 11:15:00	2014-10-20	1899-12-31 12:00:00	2014-10-20	1	351	52	61	0	0	0	0	0	1.02	1.02	0	0	5.5	0	0	3.2	0	0	<5,0	5	4.4	<1,1	1.1	-	-	-	-	-	-		-	-	None	hypertension	Levaxin	-
	83	M	37	181	75	1899-12-31 10:30:00	2014-10-20	1899-12-31 11:30:00	2014-10-20	1	654	73	63	0	0	0	0	0	1.02	1.02	0	0	6	0	0	3.2	0	0	6.6	6.6	12.3	0.5	0.5	-	-	-	-	-	-		-	-		psoriasis	Kortisonsalva Betnovat	-
	84	K	55	166	85	1899-12-31 08:50:00	2014-10-20	1899-12-31 11:30:00	2014-10-20	3	792	92	91	0	0	0	0	0	1.025	1.025	0	0	5.5	0	0	3.2	0	0	8.3	8.3	10.1	0.8	0.8	-	-	-	-	-	-		-	-	2012	-	-	flocculation in the urine sample
	85	M	41	184	97	1899-12-31 07:00:00	2014-10-20	1899-12-31 12:00:00	2014-10-20	3	1134	171	74	0	0	0	0	0	>=1,030	1.03	0	0	5.5	0	0	3.2	0	0	24.3	24.3	17.9	1.4	1.4	-	-	-	-	-	-		-	-	-	asthma, reflux esophagitis	omeprazol, pulmicort	flocculation in the urine sample
	86	K	-	153	60	1899-12-31 16:30:00	2014-10-20	1899-12-31 08:00:00	2014-10-21	3	1028	200	57	0	0	0	0	0	1.025	1.025	0	0	6.5	0	0	3.2	0	0	8.4	8.4	15.7	0.5	0.5	-	-	-	-	-	-		-	-	2014-10-04	-	-	-
	87	K	50	170	81	1899-12-31 23:30:00	2014-10-20	1899-12-31 07:30:00	2014-10-21	2	545	107	39	0	0	0	0	0	1.015	1.015	0	0	7	0	0	3.2	0	0	<5,0	5	7.3	<0,7	0.7	-	-	-	-	-	-		-	-	-	-	-	-
	88	K	63	164	77	1899-12-31 08:00:00	2014-10-20	1899-12-31 10:20:00	2014-10-20	2	498	100	49	0	0	0	0	0	1.015	1.015	0	0	7.5	0	0	3.2	0	0	<5,0	5	5.4	<0,9	0.9	-	-	-	-	-	-		-	-	-	-	anastrozol, omeprazol	-
	89	K	62	153	66	1899-12-31 04:30:00	2014-10-22	1899-12-31 06:45:00	2014-10-22	2	634	50	44	0	0	0	0	0	1.02	1.02	0	0	5.5	0	0	3.2	0	70	7.7	7.7	13.6	0.6	0.6	-	-	-	-	-	-		-	-	None	-	järn	-
	90	K	41	175	80	1899-12-31 20:00:00	2014-10-21	1899-12-31 06:00:00	2014-10-22	3	790	111	32	0	0	0	0	0	>=1,030	1.03	0	0	6	0	0	3.2	0	0	6.2	6.2	17	0.4	0.4	-	-	-	-	-	-		-	-	None	hashimotos disease	levaxin	-
	91	K	60	166	83	1899-12-31 07:00:00	2014-10-22	1899-12-31 09:00:00	2014-10-22	2	527	97	55	0	0	0	0	0	1.015	1.015	Spår - lyserat	0	5.5	0	0	3.2	0	0	<5,0	5	7.8	<0,6	0.6	-	-	-	-	-	-		-	-	-	-	omega 3, dulcuvit comp, folsyra, behepan	-
	92	K	-	168	82	1899-12-31 22:00:00	2014-10-21	1899-12-31 08:10:00	2014-10-22	1	360	67	36	0	0	0	0	0	1.015	1.015	0	0	5.5	0	0	3.2	0	0	<5,0	5	4.7	<1,1	1.1	-	-	-	-	-	-		-	-	-	-	-	-
	93	K	25	170	65	1899-12-31 20:15:00	2014-10-21	1899-12-31 04:00:00	2014-10-22	1	383	50	23	0	0	0	0	0	1.015	1.015	0	0	7	0	0	3.2	0	0	<5,0	5	7.6	<0,7	0.7	-	-	-	-	-	-		-	-	2014-10-06	-	-	-
	94	K	51	163	67	1899-12-31 07:10:00	2014-10-22	1899-12-31 09:40:00	2014-10-22	4	791	26	88	0	0	0	Spår	0	>=1,030	1.03	0	0	5	0	0	3.2	0	0	9.9	9.9	18.3	0.5	0.5	-	-	-	-	-	-		-	-	2014-10-06	-	-	-
	95	K	-	156	59	1899-12-31 08:00:00	2014-10-22	1899-12-31 10:00:00	2014-10-22	5	1066	137	54	0	0	0	0	0	>=1,030	1.03	0	0	5.5	0	0	3.2	0	0	12.1	12.1	15.3	0.8	0.8	-	-	-	-	-	-		-	-	2014-09-15	-	-	-
	96	K	33	166	68	1899-12-31 07:00:00	2014-10-22	1899-12-31 10:00:00	2014-10-22	1	524	110	52	0	0	0	0	0	1.02	1.02	Spår - intakt	0	6.5	0	0	3.2	0	0	<5,0	5	6.9	<0,7	0.7	-	-	-	-	-	-		-	-	2014-09-25, 2014-10-20	-	-	-
	97	M	46	175	68	1899-12-31 23:00:00	2014-10-21	1899-12-31 10:00:00	2014-10-22	2	499	94	55	0	0	0	0	0	1.015	1.015	0	0	7.5	0	0	3.2	0	0	8.2	8.2	8.4	1	1	-	-	-	-	-	-		-	-	-	-	warwarin	-
	98	M	28	175	76	1899-12-31 07:00:00	2014-10-22	1899-12-31 10:30:00	2014-10-22	2	1067	133	86	0	0	0	0	0	>=1,030	1.03	0	0	5	0	0	3.2	0	0	7.8	7.8	16.2	0.5	0.5	-	-	-	-	-	-		-	-	-	ceilaki	-	-
	99	K	52	156	62	1899-12-31 06:00:00	2014-10-22	1899-12-31 09:50:00	2014-10-22	1	455	82	86	0	0	0	0	0	1.015	1.015	0	0	6	0	0	3.2	0	15	8.2	8.2	5.3	1.5	1.5	-	-	-	-	-	-		-	-	-	-	-	-
	100	K	66	153	61	1899-12-31 10:00:00	2014-10-22	1899-12-31 10:30:00	2014-10-22	3	640	120	132	0	0	0	0	0	1.015	1.015	0	0	7.5	0	0	3.2	0	70	16.3	16.3	11.2	1.5	1.5	-	-	-	-	-	-		-	-	-	-	-	-
	101	K	32	165	80	1899-12-31 10:15:00	2014-10-22	1899-12-31 10:30:00	2014-10-22	3	869	177	96	0	0	0	0	0	1.02	1.02	0	0	6.5	0	0	3.2	0	0	<5,0	5	8.9	<0,6	0.6	-	-	-	-	-	-		-	-	2014-09-27	-	oral contraceptive pill	-
	102	K	34	160	79	1899-12-31 09:00:00	2014-10-22	1899-12-31 10:45:00	2014-10-22	1	228	38	27	0	0	0	0	0	<=1,005	1.005	0	0	5.5	0	0	3.2	0	0	<5,0	5	2.1	<2,4	2.4	-	-	-	-	-	-		-	-	2014-09-27	-		-
	103	K	33	160	68	1899-12-31 09:00:00	2014-10-22	1899-12-31 10:45:00	2014-10-22	4	756	63	49	0	Liten	0	1.5	1.5	1.025	1.025	25	25	5.5	Spår	0	3.2	0	0	14.5	14.5	20.9	0.7	0.7	-	-	-	-	-	-		-	-	2014-10-07	-	-	flocculation in the urine sample
	104	K	54	164	82	1899-12-31 08:00:00	2014-10-22	1899-12-31 11:00:00	2014-10-22	1	775	96	154	0	0	0	0	0	1.02	1.02	0	0	7	0	0	3.2	0	0	10.4	10.4	10.9	1	1	-	-	-	-	-	-		-	-	-	-	-	-
	105	K	58	172	60	1899-12-31 06:30:00	2014-10-22	1899-12-31 11:05:00	2014-10-22	2	330	68	36	0	0	0	0	0	1.015	1.015	0	0	7	0	0	3.2	0	0	<5,0	5	3.3	<1,5	1.5	-	-	-	-	-	-		-	-	-	-	Östrogen Livial	-
	106	M	26	178	84	1899-12-31 10:00:00	2014-10-22	1899-12-31 11:15:00	2014-10-22	2	506	98	45	0	0	0	0	0	1.015	1.015	0	0	6.5	0	0	3.2	0	0	<5,0	5	7	<0,7	0.7	-	-	-	-	-	-		-	-	-	-	-	-
	107	K	39	167	110	1899-12-31 08:30:00	2014-10-22	1899-12-31 11:15:00	2014-10-22	2	847	86	81	0	0	0	0	0	>=1,030	1.03	25	25	5.5	0	0	3.2	0	0	8.1	8.1	14.6	0.6	0.6	-	-	-	-	-	-		-	-	2014-10-15	-	-	flocculation in the urine sample
	108	K	45	155	58	1899-12-31 08:30:00	2014-10-22	1899-12-31 11:15:00	2014-10-22	2	685	162	59	0	0	0	0	0	1.02	1.02	0	0	6	0	0	3.2	0	125	5.6	5.6	5.4	1	1	-	-	-	-	-	-		-	-	2014-10-09	-	-	-
	109	K	29	170	62	1899-12-31 06:00:00	2014-10-22	1899-12-31 11:30:00	2014-10-22	3	818	168	119	0	0	0	0	0	1.02	1.02	0	0	7.5	0	0	3.2	0	0	6.4	6.4	12.4	0.5	0.5	-	-	-	-	-	-		-	-	2014-10-03	-	-	flocculation in the urine sample
	110	K	27	173	56	1899-12-31 10:00:00	2014-10-22	1899-12-31 11:50:00	2014-10-22	2	668	118	82	0	0	0	0	0	1.02	1.02	0	0	7	0	0	3.2	0	0	<5,0	5	8.2	<0,6	0.6	-	-	-	-	-	-		-	-	2014-10-16	-	oral contraceptive pill	slight flocculation
	111	M	28	174	70	1899-12-31 09:50:00	2014-10-22	1899-12-31 12:00:00	2014-10-22	2	542	112	70	0	0	0	0	0	1.02	1.02	0	0	7	0	0	3.2	0	0	<5,0	5	7.6	<0,7	0.7	-	-	-	-	-	-		-	-	-	-	-	-
	112	K	42	165	64	1899-12-31 10:00:00	2014-10-22	1899-12-31 12:30:00	2014-10-22	1	675	181	43	0	0	0	0	0	1.02	1.02	Spår - lyserat	0	5.5	0	0	3.2	0	70	10.9	10.9	4.9	2.2	2.2	-	-	-	-	-	-		-	-	2014-10-06	-	-	-
	113	K	-	174	63	1899-12-31 10:00:00	2014-10-22	1899-12-31 12:30:00	2014-10-22	2	514	92	92	0	0	0	0	0	1.02	1.02	0	0	6.5	0	0	3.2	0	15	<5,0	5	6.1	<0,8	0.8	-	-	-	-	-	-		-	-	-	-	-	-
	114	K	36	168	62	1899-12-31 10:00:00	2014-10-22	1899-12-31 12:46:00	2014-10-22	3	745	177	90	0	0	0	0	0	>=1,030	1.03	Spår- intakt	0	6	0	0	3.2	0	0	5.2	5.2	10.4	0.5	0.5	-	-	-	-	-	-		-	-	2014-10-12	-	Voxra	-
	115	K	43	167	52.3	1899-12-31 04:15:00	2014-10-23	1899-12-31 06:00:00	2014-10-23	2	829	126	33	0	0	0	0	0	>=1,030	1.03	80	80	5.5	0	0	16	0	0	<5,0	5	9.3	<0,5	0.5	-	-	-	-	-	-		-	-	2014-10-19	-	-	-
	116	K	38	163	65	1899-12-31 23:00:00	2014-10-22	1899-12-31 06:00:00	2014-10-23	3	769	1601	93	0	0	0	0	0	1.02	1.02	0	0	7	0	0	3.2	0	0	<5,0	5	14.7	<0,3	0.3	-	-	-	-	-	-		-	-	-	-	-	-
	117	K	23	174	63	1899-12-31 12:30:00	2014-10-22	1899-12-31 15:30:00	2014-10-22	1	775	205	61	0	0	0	0	0	1.025	1.025	0	0	7	0	0	3.2	0	0	<5,0	5	9.3	<0,5	0.5	-	-	-	-	-	-		-	-	2014-09-09	-	-	-
	118	K	60	167	98	1899-12-31 02:15:00	2014-10-23	1899-12-31 04:55:00	2014-10-23	2	833	62	55	0	0	0	0	0	1.025	1.025	0	0	5.5	0	0	3.2	1	0	11.3	11.3	12.3	0.9	0.9	-	-	-	-	-	-		-	-	1991-06-03	allergy (penicillin)	-	flocculation in the urine sample
	119	K	44	168	100	1899-12-31 04:00:00	2014-10-23	1899-12-31 06:00:00	2014-10-23	4	945	129	53	0	0	0	0	0	>=1,030	1.03	0	0	5.5	0	0	3.2	0	0	6.4	6.4	16.6	0.4	0.4	-	-	-	-	-	-		-	-	2014-10-06	-	-	-
	120	K	35	165	65	1899-12-31 13:00:00	2014-10-22	1899-12-31 17:00:00	2014-10-22	4	1114	179	94	0	0	0	0	0	>=1,030	1.03	25	25	6	Spår	0	3.2	0	0	15	15	25.9	0.6	0.6	-	-	-	-	-	-		-	-	2014-09-23	-	-	flocculation in the urine sample
	121	M	26	173	60	1899-12-31 23:30:00	2014-10-22	1899-12-31 06:45:00	2014-10-23	4	1148	167	41	0	0	0	0	0	>=1,030	1.03	0	0	6	0	0	3.2	0	0	11.6	11.6	29	0.4	0.4	-	-	-	-	-	-		-	-	-	-	Omeprazol, antihistamin	-
	122	K	58	162	63	1899-12-31 22:30:00	2014-10-22	1899-12-31 06:23:00	2014-10-23	1	367	86	26	0	0	0	0	0	1.015	1.015	0	0	6.5	0	0	3.2	0	0	<5,0	5	4.1	<1,2	1.2	-	-	-	-	-	-		-	-	None	-	-	-
	123	K	-	166	34	1899-12-31 03:00:00	2014-10-21	1899-12-31 11:30:00	2014-10-22	1	222	78	17	0	0	0	0	0	1.015	1.015	0	0	>=9	0	0	3.2	0	0	<5,0	5	4.2	<1,2	1.2	-	-	-	-	-	-		-	-	-	anorexia	Fluoxetine, Kaleorid	-
	124	K	53	178	95	1899-12-31 21:00:00	2014-10-22	1899-12-31 06:00:00	2014-10-23	1	781	111	26	0	0	0	0	0	1.02	1.02	0	0	5.5	0	0	3.2	0	0	<5,0	5	9.4	<0,5	0.5	-	-	-	-	-	-		-	-	-	hypertension, diabetes	Candexetil, Metoprolol, Atorvastatin, Amlodipin, Metformin, Omeprazol, Artrox, Aco vitamin/mineral	-
	125	K	42	174	75	1899-12-31 06:00:00	2014-10-23	1899-12-31 09:30:00	2014-10-23	1	225	41	16	0	0	0	0	0	1.01	1.01	0	0	7	0	0	3.2	0	0	<5,0	5	2.7	<1,9	1.9	-	-	-	-	-	-		-	-	-	-	-	-
	126	K	39	175	66	1899-12-31 09:05:00	2014-10-23	1899-12-31 11:15:00	2014-10-23	1	288	66	37	0	0	0	0	0	1.015	1.015	Spår - intakt	0	7	0	0	3.2	0	0	<5,0	5	2.7	<1,9	1.9	-	-	-	-	-	-		-	-	2014-10-04	-	-	-
	127	K	-	168	70	1899-12-31 09:20:00	2014-10-23	1899-12-31 11:30:00	2014-10-23	2	470	94	54	0	0	0	0	0	1.015	1.015	0	0	5.5	0	0	3.2	0	0	<5,0	5	5.1	<1,0	1	-	-	-	-	-	-		-	-	2014-10-06	-	-	-
	128	K	55	176	93	1899-12-31 09:00:00	2014-10-23	1899-12-31 11:30:00	2014-10-23	4	857	22	84	0	0	0	Spår	0	1.025	1.025	Spår - lyserat	0	5.5	0	0	3.2	0	70	15	15	27.8	0.5	0.5	-	-	-	-	-	-		-	-	-	breast cancer	Anastrazol	-
	129	K	49	165	62	1899-12-31 09:30:00	2014-10-23	1899-12-31 12:00:00	2014-10-23	2	359	55	52	0	0	0	0	0	1.015	1.015	Spår - intakt	0	6.5	0	0	3.2	0	0	<5,0	5	7.2	<0,7	0.7	-	-	-	-	-	-		-	-	-	-	-	-
	130	K	25	158	50	1899-12-31 11:00:00	2014-10-23	1899-12-31 11:50:00	2014-10-23	2	585	111	83	0	0	0	0	0	1.02	1.02	0	0	5	0	0	3.2	0	125	5.7	5.7	8.7	0.7	0.7	-	-	-	-	-	-		-	-	2014-10-15	-	-	-
	131	K	58	153	58	1899-12-31 09:00:00	2014-10-23	1899-12-31 12:35:00	2014-10-23	1	516	130	51	0	0	0	0	0	1.015	1.015	Spår - intakt	0	5.5	0	0	3.2	0	0	<5,0	5	5.7	<0,9	0.9	-	-	-	-	-	-		-	-	-	lumbar arthrosis	-	-
	132	K	55	166	94	1899-12-31 10:00:00	2014-10-23	1899-12-31 12:45:00	2014-10-23	2	981	173	98	0	0	0	3.9	3.9	>=1,030	1.03	0	0	5	0	0	3.2	0	0	6.4	6.4	10.7	0.6	0.6	-	-	-	-	-	-		-	-	None	hypertension	Metropolol, Enalaprin, Naproxen	-
	133	K	56	169	82	1899-12-31 08:30:00	2014-10-23	1899-12-31 11:55:00	2014-10-23	1	557	100	74	0	0	0	0	0	1.02	1.02	0	0	6	0	0	3.2	0	15	5.9	5.9	6.6	0.9	0.9	-	-	-	-	-	-		-	-	-	-	Behepan, vagifem	-
	134	K	-	160	74	1899-12-31 09:00:00	2014-10-23	1899-12-31 11:50:00	2014-10-23	1	325	53	58	0	0	0	0	0	1.015	1.015	25	25	6	0	0	3.2	0	0	<5,0	5	3.8	<1,3	1.3	-	-	-	-	-	-		-	-	-	Crohn´s disease	-	-
	135	K	32	166	64	1899-12-31 21:00:00	2014-10-23	1899-12-31 04:30:00	2014-10-24	2	827	201	30	0	0	0	0	0	1.025	1.025	0	0	5.5	0	0	3.2	0	0	<5,0	5	14.6	<0,3	0.3	-	-	-	-	-	-		-	-	-	-	oral contraceptive pill	-
	136	M	41	180	94	1899-12-31 20:00:00	2014-10-23	1899-12-31 04:50:00	2014-10-24	3	1065	153	91	0	0	0	0	0	>=1,030	1.03	0	0	5.5	0	0	3.2	0	0	7.7	7.7	32	0.2	0.2	-	-	-	-	-	-		-	-	-	-	-	-
	137	K	60	165	68	1899-12-31 23:30:00	2014-10-23	1899-12-31 03:00:00	2014-10-24	2	582	53	51	0	0	0	0	0	1.025	1.025	0	0	5.5	0	0	3.2	0	0	19.1	19.1	9.9	1.9	1.9	-	-	-	-	-	-		-	-	-	diabetes type 2, hypertension	Losartan, Felodipin, Amaryl	-
	138	K	50	168	52	1899-12-31 00:15:00	2014-10-24	1899-12-31 03:30:00	2014-10-24	2	758	93	46	0	0	0	0	0	1.025	1.025	0	0	5.5	0	0	3.2	0	0	8.6	8.6	10.5	0.8	0.8	-	-	-	-	-	-		-	-	-	-	-	-
	139	M	45	178	85	1899-12-31 19:00:00	2014-10-23	1899-12-31 21:00:00	2014-10-23	2	817	231	27	0	0	0	0	0	1.025	1.025	0	0	7	0	0	3.2	0	0	<5,0	5	9.9	<0,5	0.5	-	-	-	-	-	-		-	-	-	-	-	-
	140	M	55	178	76	1899-12-31 20:00:00	2014-10-23	1899-12-31 00:15:00	2014-10-24	1	347	94	24	0	0	0	0	0	1.02	1.02	0	0	7	0	0	3.2	0	15	<5,0	5	3.8	<1,3	1.3	-	-	-	-	-	-		-	-	-	-	-	-
	141	K	65	167	65	1899-12-31 22:00:00	2014-10-23	1899-12-31 06:00:00	2014-10-24	2	696	114	29	0	0	0	0	0	1.025	1.025	0	0	6	0	0	3.2	0	0	<5,0	5	10.6	<0,5	0.5	-	-	-	-	-	-		-	-	-	-	-	-
	142	K	-	150	58	1899-12-31 22:30:00	2014-10-23	1899-12-31 07:00:00	2014-10-24	1	623	160	51	0	0	0	0	0	1.02	1.02	0	0	7.5	0	0	3.2	0	0	<5,0	5	7.9	<0,6	0.6	-	-	-	-	-	-		-	-	None	-	-	-
	143	K	-	176	74	1899-12-31 12:30:00	2014-10-23	1899-12-31 15:35:00	2014-10-23	3	748	70	81	0	0	0	0	0	1.025	1.025	0	0	5.5	0	0	3.2	0	15	11.8	11.8	11	1.1	1.1	-	-	-	-	-	-		-	-	2014-10-10	-	ventataxin	-
	144	M	57	180	69	1899-12-31 15:10:00	2014-10-22	1899-12-31 17:10:00	2014-10-22	2	516	76	53	0	0	0	1.5	1.5	1.015	1.015	0	0	5.5	spår	0	3.2	0	0	81.7	81.7	10.2	8	8	-	-	-	-	-	-		-	-	-	-	-	-
	145	K	42	165	92	1899-12-31 13:05:00	2014-10-23	1899-12-31 13:50:00	2014-10-23	2	459	102	47	0	0	0	0	0	1.015	1.015	0	0	7	0	0	16	0	0	<5,0	5	6.2	<0,8	0.8	-	-	-	-	-	-		-	-	-	-	-	-
	146	K	27	163	59	1899-12-31 05:45:00	2014-10-24	1899-12-31 07:50:00	2014-10-24	1	244	36	25	0	0	0	0	0	1.01	1.01	0	0	7	0	0	3.2	0	0	<5,0	5	4.2	<1,2	1.2	-	-	-	-	-	-		-	-	2014-10-15	-	yas	-
	147	K	-	175	73	1899-12-31 06:20:00	2014-10-24	1899-12-31 08:20:00	2014-10-24	1	731	93	111	0	0	0	0	0	1.025	1.025	spår-intakt	0	5	0	0	3.2	0	70	6.3	6.3	9.1	0.7	0.7	-	-	-	-	-	-		-	-	-	-	lergigan	-
	148	M	16	179	69	1899-12-31 23:50:00	2014-10-23	1899-12-31 07:30:00	2014-10-24	3	1111	194	88	0	0	0	0	0	1.025	1.025	0	0	7	spår	0	3.2	0	0	8.2	8.2	19.7	0.4	0.4	-	-	-	-	-	-		-	-	-	asthma	astma lkm	food allergy
	149	M	55	180	78	1899-12-31 22:15:00	2014-10-23	1899-12-31 07:05:00	2014-10-24	3	731	88	90	0	0	0	0	0	1.025	1.025	0	0	5.5	0	0	3.2	0	0	5.5	5.5	17.6	0.3	0.3	-	-	-	-	-	-		-	-	-	asthma	pulmicort	-
	150	K	39	165	94	1899-12-31 04:30:00	2014-10-27	1899-12-31 07:10:00	2014-10-27	4	940	54	97	0	liten	0	spår	0	>=1,030	1.03	0	0	5	0	0	3.2	0	15	13.6	13.6	19.2	0.7	0.7	-	-	-	-	-	-		-	-	-	-	-	slight flocculation
	151	M	38	-	79	1899-12-31 21:00:00	2014-10-26	1899-12-31 06:00:00	2014-10-27	3	922	61	43	0	0	0	0	0	>=1,030	1.03	0	0	5.5	0	0	3.2	0	0	9.9	9.9	21.8	0.5	0.5	-	-	-	-	-	-		-	-	-	-	-	-
	152	K	40	169	55	1899-12-31 21:00:00	2014-10-26	1899-12-31 06:00:00	2014-10-27	1	519	68	30	0	0	0	0	0	1.02	1.02	0	0	6	0	0	3.2	0	0	<5,0	5	9.9	<0,5	0.5	-	-	-	-	-	-		-	-	2014-10-09	-	-	-
	153	K	57	176	79	1899-12-31 10:50:00	2014-10-27	1899-12-31 11:10:00	2014-10-27	2	752	95	97	0	0	0	0	0	1.025	1.025	0	0	5	0	0	3.2	0	70	<5,0	5	12	<0,4	0.4	-	-	-	-	-	-		-	-	-	-	-	-
	154	K	31	167	61	1899-12-31 09:30:00	2014-10-27	1899-12-31 11:40:00	2014-10-27	2	880	109	108	0	0	0	0	0	>=1,030	1.03	0	0	6	0	0	3.2	0	0	6	6	13	0.5	0.5	-	-	-	-	-	-		-	-	2014-06-09	-	-	pregnant
	155	K	31	167	78	1899-12-31 10:00:00	2014-10-27	1899-12-31 12:05:00	2014-10-27	2	819	177	115	0	0	0	0	0	1.02	1.02	0	0	7.5	0	0	33	0	0	<5	5	10.1	<0,5	0.5	-	-	-	-	-	-		-	-	2014-10-03	-	-	-
	156	M	62	192	112	1899-12-31 22:00:00	2014-10-26	1899-12-31 06:40:00	2014-10-27	2	877	102	50	0	0	0	0	0	>=1,030	1.03	0	0	6	0	0	3.2	0	0	5.6	5.6	14.6	0.4	0.4	-	-	-	-	-	-		-	-	-	atrial fibrillation	waran, felodipin, metorolol	-
	157	K	60	168	70	1899-12-31 20:30:00	2014-10-27	1899-12-31 04:30:00	2014-10-28	2	692	120	44	0	0	0	0	0	>=1,030	1.03	0	0	5.5	0	0	3.2	0	0	6.5	6.5	9.9	0.7	0.7	-	-	-	-	-	-		-	-	None	-	-	-
	158	K	46	164	82	1899-12-31 02:30:00	2014-10-28	1899-12-31 07:05:00	2014-10-28	3	892	111	61	0	0	0	0	0	>=1,030	1.03	0	0	5	0	0	3.2	0	0	6.8	6.8	20	0.3	0.3	-	-	-	-	-	-		-	-	-	hypothyreosis, hypertension	levaxin, enalapril	-
	159	K	52	174	59	1899-12-31 19:00:00	2014-10-27	1899-12-31 05:20:00	2014-10-28	1	364	75	19	0	0	0	0	0	1.01	1.01	0	0	6	0	0	3.2	0	0	<5,0	5	6	<0,8	0.8	-	-	-	-	-	-		-	-	None	-	-	-
	160	K	35	174	70	1899-12-31 06:50:00	2014-10-28	1899-12-31 07:15:00	2014-10-28	1	668	55	17	0	0	0	0	0	>=1,030	1.03	25	25	5.5	0	0	3.2	0	0	<5,0	5	11.9	<0,4	0.4	-	-	-	-	-	-		-	-	2014-10-27	depression	citalopram	-
	161	M	48	178	110	1899-12-31 22:10:00	2014-10-27	1899-12-31 06:05:00	2014-10-28	1	429	85	18	0	0	0	0	0	1.01	1.01	0	0	5	0	0	3.2	0	0	<5,0	5	7.7	<0,6	0.6	-	-	-	-	-	-		-	-	-	-	-	-
	162	M	43	187	76	1899-12-31 22:00:00	2014-10-27	1899-12-31 06:30:00	2014-10-28	2	797	120	50	0	0	0	0	0	>=1,030	1.03	0	0	5.5	0	0	3.2	0	0	10	10	19.5	0.5	0.5	-	-	-	-	-	-		-	-	-	-	-	-
	163	M	34	178	72	1899-12-31 20:00:00	2014-10-27	1899-12-31 06:30:00	2014-10-28	2	995	183	29	0	0	0	0	0	>=1,030	1.03	0	0	6	0	0	3.2	0	0	7.5	7.5	20.3	0.4	0.4	-	-	-	-	-	-		-	-	-	-	-	-
	164	K	61	164	64	1899-12-31 22:00:00	2014-10-27	1899-12-31 06:00:00	2014-10-28	2	836	166	34	0	0	0	0	0	1.025	1.025	0	0	6	0	0	3.2	0	0	5.3	5.3	13.4	0.4	0.4	-	-	-	-	-	-		-	-	-	-	-	-
	165	M	65	186	84	1899-12-31 23:00:00	2014-10-27	1899-12-31 06:45:00	2014-10-28	2	845	140	32	0	0	0	0	0	1.025	1.025	0	0	5.5	0	0	3.2	0	0	<5,0	5	11.6	<0,4	0.4	-	-	-	-	-	-		-	-	-	-	-	-
	166	M	56	175	78	1899-12-31 22:00:00	2014-10-27	1899-12-31 06:00:00	2014-10-28	1	624	76	30	0	0	0	0	0	1.02	1.02	0	0	5.5	0	0	3.2	0	0	<5,0	5	9.7	<0,5	0.5	-	-	-	-	-	-		-	-	-	-	-	-
	167	M	64	175	79	1899-12-31 21:00:00	2014-10-27	1899-12-31 06:00:00	2014-10-28	1	788	124	22	0	0	0	0	0	1.025	1.02	0	0	5.5	0	0	3.2	0	0	<5,0	5	13.3	<0,4	0.4	-	-	-	-	-	-		-	-	-	-	-	-
	168	K	62	164	73	1899-12-31 22:00:00	2014-10-28	1899-12-31 08:40:00	2014-10-29	2	549	121	37	0	0	0	0	0	1.025	1.025	0	0	6	0	0	3.2	0	0	<5,0	5	7.8	<0,6	0.6	-	-	-	-	-	-		-	-	-	migraine	-	-
	169	K	-	173	68	1899-12-31 21:00:00	2014-10-28	1899-12-31 07:00:00	2014-10-29	2	597	112	28	0	0	0	0	0	1.025	1.025	0	0	6	0	0	3.2	0	0	<5,0	5	14.2	<0,4	0.4	-	-	-	-	-	-		-	-	-	previosu surgery of melanoma	-	-
	170	K	31	160	55	1899-12-31 23:00:00	2014-10-28	1899-12-31 09:00:00	2014-10-29	2	869	178	82	0	0	0	0	0	1.02	1.02	0	0	6.5	0	0	3.2	0	0	<5,0	5	9.2	<0,5	0.5	-	-	-	-	-	-		-	-	-		-	-
	171	K	37	170	60	1899-12-31 23:00:00	2014-10-28	1899-12-31 09:00:00	2014-10-29	1	1130	130	36	0	0	0	0	0	1.025	1.025	0	0	6.5	0	0	3.2	0	0	5.1	5.1	12.6	0.4	0.4	-	-	-	-	-	-		-	-	-	-	-	-
	172	K	21	179	73	1899-12-31 07:30:00	2014-10-29	1899-12-31 10:00:00	2014-10-29	1	365	64	20	0	0	0	Spår	0	1.015	1.015	0	0	7	0	0	3.2	0	0	<5,0	5	4.2	<5,0	5	-	-	-	-	-	-		-	-	2014-10-14	-	-	-
	173	K	33	177	85	1899-12-31 09:00:00	2014-10-29	1899-12-31 10:00:00	2014-10-29	1	564	67	67	0	0	0	0	0	1.02	1.02	0	0	6	0	0	3.2	0	0	6.4	6.4	9.8	0.7	0.7	-	-	-	-	-	-		-	-	2014-09-29	Chrohn´s disease	-	-
	174	K	27	156	47	1899-12-31 06:00:00	2014-10-29	1899-12-31 09:00:00	2014-10-29	2	257	27	25	0	0	0	0	0	1.01	1.01	0	0	6	0	0	3.2	0	0	<5,0	5	3.2	<1,6	1.6	-	-	-	-	-	-		-	-	hormone intrauterine coil	-		-
	175	K	43	171	70.5	1899-12-31 05:30:00	2014-10-29	1899-12-31 09:00:00	2014-10-29	1	729	224	36	0	0	0	0	0	1.02	1.01	0	0	7	0	0	3.2	0	15	<5,0	5	7	<0,7	0.7	-	-	-	-	-	-		-	-	2014-09-09	Hypertension	enalapril, normorix, amilorid	-
	176	K	51	172	64	1899-12-31 08:40:00	2014-10-29	1899-12-31 11:30:00	2014-10-29	4	695	108	69	0	0	0	0	0	1.025	1.025	0	0	5.5	0	0	3.2	0	0	26.2	26.2	14.1	1.9	1.9	-	-	-	-	-	-		-	-	-	-	-	-
	177	K	41	164	64	1899-12-31 07:20:00	2014-10-29	1899-12-31 11:15:00	2014-10-29	1	411	59	55	0	0	0	0	0	1.015	1.015	0	0	6	0	0	3.2	0	0	<5,0	5	4.7	<1,1	1.1	-	-	-	-	-	-		-	-	-	asthma, allergy (dust)	-	-
	178	K	49	157	62	1899-12-31 09:00:00	2014-10-29	1899-12-31 11:15:00	2014-10-29	2	570	93	57	0	0	0	0	0	1.02	1.02	25	25	6	0	0	3.2	0	0	7.9	7.9	10.7	0.7	0.7	-	-	-	-	-	-		-	-	-	-	-	-
	179	K	26	162	71	1899-12-31 11:00:00	2014-10-29	1899-12-31 11:30:00	2014-10-29	1	214	54	21	0	0	0	0	0	<=1,005	1.005	80	80	6	0	0	3.2	0	0	7.5	7.5	2.4	3.1	3.1	-	-	-	-	-	-		-	-	2014-10-22	-	-	-
	180	K	46	162	75	1899-12-31 09:00:00	2014-10-29	1899-12-31 11:30:00	2014-10-29	1	348	78	32	0	0	0	0	0	1.01	1.01	0	0	5.5	0	0	3.2	0	70	<5,0	5	3.4	<1,5	1.5	-	-	-	-	-	-		-	-	2013	-	-	-
	181	K	41	173	67	1899-12-31 09:00:00	2014-10-29	1899-12-31 11:40:00	2014-10-29	2	755	145	116	0	0	0	0	0	1.02	1.02	spår-intakt	0	7	0	0	3.2	0	0	<5,0	5	9.8	<0,5	0.5	-	-	-	-	-	-		-	-	2014-10-23	-	-	-
	182	K	54	171.8	53.5	1899-12-31 08:45:00	2014-10-29	1899-12-31 11:45:00	2014-10-29	1	630	74	48	>=55	0	0	0	0	1.015	1.015	0	0	6	0	0	3.2	0	0	6.9	6.9	4	1.7	1.7	-	-	-	-	-	-		-	-	2009	diabetes, surgery of breast cancer	diabetes drug	-
	183	K	56	158	69	1899-12-31 09:00:00	2014-10-29	1899-12-31 11:45:00	2014-10-29	3	881	147	135	0	0	0	0	0	>=1,030	1.03	spår-intakt	0	5.5	0	0	3.2	0	0	7.1	7.1	10.6	0.7	0.7	-	-	-	-	-	-		-	-	2010	-	-	-
	184	M	60	177	72	1899-12-31 23:00:00	2014-10-28	1899-12-31 06:30:00	2014-10-29	2	557	102	47	0	0	0	0	0	1.015	1.015	0	0	6	0	0	3.2	0	0	<5,0	5	<0,7	<0,7	0.7	-	-	-	-	-	-		-	-	-	-	-	-
	185	K	28	155	59	1899-12-31 09:00:00	2014-10-29	1899-12-31 12:00:00	2014-10-29	2	1044	170	110	0	0	0	0	0	>=1,030	1.03	0	0	5.5	0	0	3.2	0	0	5.5	5.5	9.9	0.6	0.6	-	-	-	-	-	-		-	-	2014-10-02	-	-	-
	186	M	18	173	70	1899-12-31 23:00:00	2014-10-28	1899-12-31 09:00:00	2014-10-29	2	864	106	43	0	0	0	0	0	>=1,030	1.03	0	0	5.5	0	0	3.2	0	0	6.3	6.3	7	0.9	0.9	-	-	-	-	-	-		-	-	-	-	-	-
	187	K	39	170	65	1899-12-31	2014-10-29	1899-12-31 07:30:00	2014-10-29	3	858	105	44	0	0	0	0	0	1.025	1.025	1	1	5.5	0	0	3.2	0	0	6.5	6.5	7.2	0.9	0.9	-	-	-	-	-	-		-	-	2014-09-12	-	-	-
	188	M	44	173	80	1899-12-31 23:00:00	2014-10-28	1899-12-31 07:30:00	2014-10-29	3	954	158	36	0	0	0	0	0	>=1,030	1.03	0	0	5.5	0	0	3.2	0	0	<5,0	5	14.4	<0,3	0.3	-	-	-	-	-	-		-	-	-	-	-	-
	189	K	32	165	63	1899-12-31 22:30:00	2014-10-29	1899-12-31 08:30:00	2014-10-29	3	1066	234	59	0	0	0	0	0	>=1,030	1.03	0	0	6.5	0	0	3.2	0	0	5.5	5.5	11.1	0.5	0.5	-	-	-	-	-	-		-	-	2014-10-18	-	-	-
	190	K	49	160	173	1899-12-31 03:00:00	2014-10-30	1899-12-31 06:30:00	2014-10-30	1	770	185	64	0	0	0	0	0	1.02	1.02	0	0	7	0	0	3.2	0	0	5.1	5.1	7.7	0.7	0.7	-	-	-	-	-	-		-	-	None	cholecystectomy	-	Troligtvis fel vikt
	191	K	17	167	59	1900-01-01	2014-10-29	1899-12-31 06:30:00	2014-10-30	3	1021	188	156	0	0	0	0	0	>=1,030	1.03	0	0	5.5	0	0	3.2	0	0	7.7	7.7	14.7	0.5	0.5	-	-	-	-	-	-		-	-	2014-10-20	-	-	-
	192	K	20	164	62	1900-01-01	2014-10-29	1899-12-31 06:30:00	2014-10-30	4	991	118	125	0	0	0	0	0	>=1,030	1.03	0	0	5.5	0	0	3.2	0	0	6.5	6.5	13.2	0.5	0.5	-	-	-	-	-	-		-	-	2014-10-12	-	-	-
	193	K	72	170	76	1900-01-01	2014-10-29	1899-12-31 06:30:00	2014-10-30	1	369	59	46	0	0	0	0	0	1.015	1.015	Spår - lyserat	0	5.5	0	0	3.2	0	0	<5,0	5	3	<1,7	1.7	-	-	-	-	-	-		-	-	None	-	-	-
	194	M	41	181	84	1899-12-31 09:00:00	2014-10-29	1899-12-31 07:00:00	2014-10-30	4	1170	105	80	0	0	0	0	0	>=1,030	1.03	0	0	5.5	0	0	3.2	0	0	11.2	11.2	34.6	0.3	0.3	-	-	-	-	-	-		-	-	-	-	Ursofalk, Calcichew	-
	195	K	22	162	55	1899-12-31 08:50:00	2014-10-30	1899-12-31 09:00:00	2014-10-30	2	681	165	37	0	0	0	0	0	1.025	1.025	0	0	6	0	0	3.2	0	0	25.6	25.6	7.2	3.6	3.6	-	-	-	-	-	-		-	-	2014-10-27	allergy (pollen)		-
	196	K	36	172	63	1899-12-31 09:00:00	2014-10-30	1899-12-31 09:20:00	2014-10-30	4	926	113	110	0	0	0	0	0	1.025	1.025	0	0	7	Spår	0	3.2	0	0	7.8	7.8	18.4	0.4	0.4	-	-	-	-	-	-		-	-	-	endometriosis	-	-
	197	K	47	164	65	1899-12-31 02:00:00	2014-10-30	1899-12-31 05:00:00	2014-10-30	3	729	138	36	0	0	0	0	0	1.025	1.025	0	0	6	0	0	3.2	0	0	5	5	13.3	0.3	0.3	-	-	-	-	-	-		-	-	None	-	Gestrina	-
	198	K	41	164	62	1899-12-31 21:00:00	2014-10-29	1899-12-31 05:45:00	2014-10-30	2	272	66	10	0	0	0	0	0	1.01	1.01	Spår - lyserat	0	7	0	0	3.2	0	0	<5,0	5	4.6	<1,1	1.1	-	-	-	-	-	-		-	-	2014-10-28	-	-	-
	199	K	50	169	65	1899-12-31 23:45:00	2014-10-29	1899-12-31 06:00:00	2014-10-30	3	581	87	37	0	0	0	0	0	1.025	1.025	Spår - lyserat	0	5	0	0	3.2	1	0	5.6	5.6	15.3	0.4	0.4	-	-	-	-	-	-		-	-	None	-	Tamoxifen	-
	200	M	55	188	105	1899-12-31 16:00:00	2014-10-29	1899-12-31 17:00:00	2014-10-29	2	789	172	67	0	0	0	0	0	1.025	1.025	0	0	5.5	0	0	3.2	0	0	<5,0	5	10	<0,5	0.5	-	-	-	-	-	-		-	-	-	shoulder surgery (recent)	Oxycodone teva, alvedon, oxynorm	-
	201	M	28	203	118	1899-12-31 14:00:00	2014-10-29	1899-12-31 16:45:00	2014-10-29	1	499	150	33	0	0	0	0	0	1.02	1.02	0	0	6	0	0	3.2	0	0	<5,0	5	6.4	<0,8	0.8	-	-	-	-	-	-		-	-	-	-	-	-
	202	K	51	161	58	1899-12-31 09:00:00	2014-10-30	1899-12-31 11:45:00	2014-10-30	2	712	142	78	0	0	0	0	0	1.025	1.025	0	0	6.5	0	0	3.2	0	0	<5,0	5	6.7	<0,7	0.7	-	-	-	-	-	-		-	-	-	-	-	-
	203	K	52	175	69	1899-12-31 09:00:00	2014-10-30	1899-12-31 11:30:00	2014-10-30	3	1074	196	66	0	0	0	0	0	>=1,030	1.03	0	0	5.5	0	0	3.2	0	125	21.2	21.2	9.4	2.3	2.3	-	-	-	-	-	-		-	-	-	-	-	-
	204	K	-	165	71	1899-12-31 09:30:00	2014-10-30	1899-12-31 12:00:00	2014-10-30	2	604	71	60	0	0	0	0	0	1.02	1.02	0	0	6.5	0	0	3.2	0	0	6.3	6.3	9.7	0.6	0.6	-	-	-	-	-	-		-	-	2014-10-16	-	-	-
	205	M	54	183	71	1899-12-31 21:30:00	2014-10-29	1899-12-31 06:30:00	2014-10-30	1	534	105	43	0	0	0	0	0	1.02	1.02	0	0	5.5	0	0	3.2	0	0	<5,0	5	6	<0,8	0.8	-	-	-	-	-	-		-	-	-	-	-	-
	206	K	26	172	64	1899-12-31 10:23:00	2014-10-30	1899-12-31 12:45:00	2014-10-30	2	424	73	85	0	0	0	0	0	1.015	1.015	Spår - intakt	0	7.5	0	0	3.2	0	0	<5,0	5	4.8	<1,0	1	-	-	-	-	-	-		-	-	2014-10-27	asthma, allergy	benventil, beclomet	-
	207	K	48	166	89	1899-12-31 11:15:00	2014-10-30	1899-12-31 12:35:00	2014-10-30	2	543	128	55	0	0	0	0	0	1.02	1.02	0	0	6	0	0	3.2	0	0	8.7	8.7	9.3	0.9	0.9	-	-	-	-	-	-		-	-	hormone intrauterine coil	rheumatoid arthritis	Methotrexate, naproxen, folsyra	-
	208	M	49	174	112	1899-12-31 17:15:00	2014-10-30	1899-12-31 19:45:00	2014-10-30	3	1029	175	83	0	0	0	0	0	>=1,030	1.03	0	0	6	0	0	3.2	0	0	6.2	6.2	17	0.4	0.4	-	-	-	-	-	-		-	-	-	-	-	Fällning i provet
	209	M	45	179	78	1899-12-31 02:00:00	2014-10-31	1899-12-31 06:25:00	2014-10-31	1	363	72	41	0	0	0	0	0	1.01	1.01	0	0	5.5	0	0	3.2	0	0	<5,0	5	3.6	<1,4	1.4	-	-	-	-	-	-		-	-	-	-	-	-
	210	K	50	164	77	1899-12-31 23:00:00	2014-10-29	1899-12-31 06:30:00	2014-10-30	2	591	109	18	0	0	0	0	0	1.025	1.025	0	0	5.5	0	0	3.2	0	0	<5,0	5	8	<0,6	0.6	-	-	-	-	-	-		-	-	-	Artros, meniskruptur	-	-
	211	M	50	177	82	1899-12-31 18:00:00	2014-10-29	1899-12-31 05:00:00	2014-10-30	3	888	192	30	0	0	0	0	0	>=1,030	1.03	0	0	5.5	0	0	3.2	0	0	<5,0	5	12.7	<0,4	0.4	-	-	-	-	-	-		-	-	-	-	-	-
	212	M	37	175	69	1899-12-31 18:00:00	2014-10-28	1899-12-31 10:00:00	2014-10-29	3	830	137	68	0	0	0	0	0	1.025	1.025	0	0	6.5	0	0	3.2	0	0	8.2	8.2	18.1	0.5	0.5	-	-	-	-	-	-		-	-	-	-	-	-
	213	M	54	175	89	1899-12-31 22:30:00	2014-10-30	1899-12-31 05:30:00	2014-10-31	2	601	104	34	0	0	0	0	0	1.02	1.02	0	0	6.5	0	0	3.2	0	0	7.8	7.8	8.3	1	1	-	-	-	-	-	-		-	-	-	cancer + recurrence with metastasis	Furix, Betmiga, metadon, alendronat, calciopos d-forte, magnesium	-
	214	K	53	171	67	1899-12-31 21:00:00	2014-10-30	1899-12-31 05:00:00	2014-10-31	2	522	101	26	0	0	0	0	0	1.02	1.02	0	0	6.5	0	0	3.2	0	0	<5,0	5	8.8	<0,6	0.6	-	-	-	-	-	-		-	-	None	-	Algomega, rosenrot, magnesium	-
	215	K	33	159	73	1899-12-31 21:00:00	2014-10-28	1899-12-31 07:30:00	2014-10-29	2	473	81	24	0	0	0	0	0	1.015	1.015	0	0	6.5	0	0	3.2	0	70	<5,0	5	6.6	<0,8	0.8	-	-	-	-	-	-		-	-	-	-	Vendlafaxine, Qiara	-
	216	M	25	173	81	1899-12-31 07:00:00	2014-10-30	1899-12-31 17:50:00	2014-10-30	3	634	106	26	0	0	0	0	0	1.025	1.025	0	0	5.5	0	0	3.2	0	0	<5,0	5	5.1	<1,0	1	-	-	-	-	-	-		-	-	-	-	-	-
	217	M	53	183	93	1899-12-31 21:00:00	2014-10-30	1899-12-31 07:00:00	2014-10-31	4	915	85	142	0	0	0	0	0	1.025	1.025	0	0	6	0.3	0.3	3.2	0	0	22.7	22.7	29.1	0.8	0.8	-	-	-	-	-	-		-	-	-	allergy	-	-
	218	M	47	189	94	1899-12-31 23:45:00	2014-10-30	1899-12-31 06:40:00	2014-10-31	3	661	74	29	5.5	0	0	0	0	1.025	1.025	0	0	5.5	0	0	3.2	0	0	<5,0	5	12.7	<0,4	0.4	-	-	-	-	-	-		-	-	-	diabetes type 1	Lantus, Humalog, Simvastatin	-
	219	K	46	160	63	1899-12-31 21:30:00	2014-10-30	1899-12-31 06:10:00	2014-10-31	3	1135	232	53	0	0	0	0	0	>=1,030	1.03	0	0	5.5	0	0	3.2	0	0	5.8	5.8	19.3	0.3	0.3	-	-	-	-	-	-		-	-	2014-10-24	-	-	-
	220	M	61	183	95	1899-12-31 23:00:00	2014-10-30	1899-12-31 06:00:00	2014-10-31	3	1005	212	54	0	0	0	0	0	>=1,030	1.03	0	0	5.5	0	0	3.2	0	0	<5,0	5	14.6	<0,3	0.3	-	-	-	-	-	-		-	-	-	-	Levaxin, Omeprazol	-
	221	K	34	177	64	1899-12-31 07:00:00	2014-10-31	1899-12-31 07:30:00	2014-10-31	4	921	187	108	0	0	0	Spår	0	1.02	1.02	0	0	7.5	Spår	0	3.2	0	0	7.8	7.8	16.9	0.5	0.5	-	-	-	-	-	-		-	-	-	psoriasis arthritis, osteoporosis, hypothyreosis	Levaxin, Duroferon, Citodon, Voltaren	-
	222	M	40	187	75	1899-12-31 18:30:00	2014-10-30	1899-12-31 22:30:00	2014-10-30	2	609	104	50	0	0	0	0	0	1.025	1.025	0	0	5.5	0	0	3.2	0	0	<5,0	5	7.9	<0,6	0.6	-	-	-	-	-	-		-	-	-		-	-
	223	M	26	185	80	1899-12-31 23:00:00	2014-10-30	1899-12-31 07:00:00	2014-10-31	1	902	97	34	0	0	0	0	0	1.02	1.02	0	0	6	0	0	3.2	0	0	<5,0	5	12	<0,4	0.4	-	-	-	-	-	-		-	-	-	-	-	-
	224	K	50	160	63	1899-12-31 23:30:00	2014-10-30	1899-12-31 07:00:00	2014-10-31	2	772	162	33	0	0	0	0	0	1.025	1.025	0	0	6.5	0	0	3.2	0	15	<5,0	5	6.9	<0,7	0.7	-	-	-	-	-	-		-	-	None		-	-
	225	K	66	158	90	1899-12-31 21:30:00	2014-10-29	1899-12-31 23:30:00	2014-10-29	3	675	94	62	0	0	0	0	0	1.025	1.025	0	0	6	0	0	3.2	0	70	8.8	8.8	12.7	0.7	0.7	-	-	-	-	-	-		-	-	-	diabetes, fibromyalgia, hypertension	Furix, enalapril sandoz, atenolol accord, metformin actavis, januvia, arthrotec, tramadol retard, medartum, emgesan, novo rapid flex pen, lantus solostar, alvedon	-
	226	K	21	165	55	1899-12-31 21:30:00	2014-10-29	1899-12-31 21:30:00	2014-10-29	2	1062	228	104	0	0	0	0	0	1.02	1.02	0	0	7.5	0	0	3.2	0	0	9.7	9.7	10.8	0.9	0.9	-	-	-	-	-	-		-	-	-	-	-	-
	227	M	81	172	106	1899-12-31 21:30:00	2014-10-29	1899-12-31 23:30:00	2014-10-29	2	361	94	26	0	0	0	0	0	1.01	1.01	0	0	5.5	0	0	3.2	0	0	51.4	51.4	3.6	14.3	14.3	-	-	-	-	-	-		-	-	-	diabetes, stroke, heart failure, hypertension	Esomeprazol, ratiopharm, alfacalcidol, alternova symbicort, felodipin, hexal, furix, simvastatin, orion, isosorbidmonitrat, astimex, carvedilol hexal, allopurinol nordic drugs, gabapentin actavis, biprasorin, laxido, acetylcystein sandox, novorapid, flex pen, insulatard, flex pen, alvedon	-
	228	K	21	165	64	1899-12-31 00:15:00	2014-10-31	1899-12-31 06:10:00	2014-10-31	2	959	185	45	0	0	0	0	0	>=1,030	1.03	25	25	5.5	0	0	3.2	1	0	25.7	25.7	14	1.8	1.8	-	-	-	-	-	-		-	-	2014-10-04		-	Fällning i provet
	229	M	52	185	98	1899-12-31 01:10:00	2014-10-31	1899-12-31 06:50:00	2014-10-31	3	1038	160	137	0	0	0	0	0	>=1,030	1.03	0	0	6	0	0	3.2	0	0	14.8	14.8	19.2	0.8	0.8	-	-	-	-	-	-		-	-	-	migraine	Alvedon, naproxen	-
	230	K	20	164	62	1899-12-31 23:25:00	2014-10-30	1899-12-31 06:30:00	2014-10-31	2	1099	218	103	0	0	0	Spår	0	1.025	1.025	0	0	5.5	0	0	3.2	0	0	11.1	11.1	13.6	0.8	0.8	-	-	-	-	-	-		-	-	2014-10-03	-	-	-
	231	K	74	162	88	1899-12-31 02:30:00	2014-10-31	1899-12-31 06:30:00	2014-10-31	4	1089	148	97	0	0	0	Spår	0	>=1,030	1.03	0	0	5.5	0	0	3.2	0	0	34.2	34.2	26.8	1.3	1.3	-	-	-	-	-	-		-	-	-	knee replacement	-	mkt fällning
	232	K	18	167	53	1899-12-31 23:40:00	2014-10-30	1899-12-31 06:30:00	2014-10-31	2	779	247	56	0	0	0	0	0	1.015	1.015	0	0	8.5	spår	0	3.2	0	0	6.6	6.6	9	0.7	0.7	-	-	-	-	-	-		-	-	2014-10-22	-	-	Fällning i provet
	233	M	77	170	92	1899-12-31 00:10:00	2014-10-31	1899-12-31 06:33:00	2014-10-31	2	1086	257	91	0	0	0	0	0	1.025	1.025	0	0	7	0	0	3.2	0	0	14.8	14.8	11.1	1.3	1.3	-	-	-	-	-	-		-	-	-	hypertension	-	-
	234	K	27	169	60	1899-12-31 21:00:00	2014-10-30	1899-12-31 07:00:00	2014-10-31	2	649	46	31	0	0	0	0	0	1.02	1.02	0	0	6	0	0	3.2	0	15	5.5	5.5	14.9	0.4	0.4	-	-	-	-	-	-		-	-	2014-10-17	-	-	-
	235	K	67	175	75	1899-12-31 22:00:00	2014-10-30	1899-12-31 06:55:00	2014-10-31	3	902	94	58	0	0	0	0	0	>=1,030	1.03	0	0	5	0	0	3.2	0	70	6.6	6.6	14.3	0.5	0.5	-	-	-	-	-	-		-	-	-	-	-	-
	236	K	61	166	56	1899-12-31 06:00:00	2014-10-31	1899-12-31 08:15:00	2014-10-31	2	354	50	65	0	0	0	0	0	1.01	1.01	spår-intakt	0	5.5	0	0	3.2	0	70	<5,0	5	5.4	<0,9	0.9	-	-	-	-	-	-		-	-	-	breast camcer, malign melanoma	tamoxifen	-
	237	K	21	176	65	1899-12-31 21:00:00	2014-10-30	1899-12-31 07:00:00	2014-10-31	3	886	72	31	0	0	0	0	0	>=1,030	1.03	spår-intakt	0	6	0	0	3.2	0	0	10.1	10.1	20.4	0.5	0.5	-	-	-	-	-	-		-	-	-	hypothyreosis	levaxin	-
	238	M	39	180.5	82	1899-12-31 13:00:00	2014-11-02	1899-12-31 15:30:00	2014-11-02	4	996	185	107	0	0	0	0	0	>=1,030	1.03	0	0	5.5	0	0	3.2	0	0	8.4	8.4	21.1	0.4	0.4	-	-	-	-	-	-		-	-	-	-	-	-
	239	K	32	174	65	1899-12-31 13:00:00	2014-11-02	1899-12-31 15:33:00	2014-11-02	3	583	114	73	0	0	0	0	0	1.02	1.02	0	0	6.5	0	0	3.2	0	0	<5,0	5	7.2	<0,7	0.7	-	-	-	-	-	-		-	-	2014-09-27	-	-	-
	240	K	61	163	88	1899-12-31 23:30:00	2014-11-01	1899-12-31 09:30:00	2014-11-02	2	606	93	18	0	0	0	0	0	1.02	1.02	0	0	6	0	0	3.2	0	500	5	5	7.8	0.6	0.6	-	-	-	-	-	-		-	-	-	fibromyalgia, hypothyreosis	plendil, levaxin, normorix	-
	241	M	65	184	94	1899-12-31 22:00:00	2014-11-01	1899-12-31 09:00:00	2014-11-02	2	919	122	32	0	0	0	0	0	>=1,030	1.03	0	0	5.5	0	0	3.2	0	0	5.7	5.7	14.9	0.4	0.4	-	-	-	-	-	-		-	-	-	angina pectoris	candasartan, trombyl, felodipin, imdur, omeprazol, metoprolol	-
	242	M	38	184	123	1899-12-31 23:30:00	2014-11-02	1899-12-31 06:30:00	2014-11-03	2	419	101	44	0	0	0	0	0	1.02	1.02	0	0	6.5	0	0	3.2	0	0	<5,0	5	8.3	<0,6	0.6	-	-	-	-	-	-		-	-	-	-	-	-
	243	M	22	167	70	1899-12-31 01:30:00	2014-11-03	1899-12-31 03:31:00	2014-11-03	2	1049	36	47	0	0	0	0	0	>=1,030	1.03	0	0	6	0	0	3.2	0	0	9.8	9.8	19.2	0.5	0.5	-	-	-	-	-	-		-	-	-		-	-
	244	K	52	154	70.8	1899-12-31 01:23:00	2014-11-03	1899-12-31 07:45:00	2014-11-03	1	271	30	23	0	0	0	0	0	1.01	1.01	0	0	5.5	0	0	3.2	0	0	<0,5	0.5	5.2	<1,0	1	-	-	-	-	-	-		-	-	None	allergy (pollen), hypertension	levaxin, pulmicort, enalapril actavis, mommox	-
	245	K	25	156	63	1899-12-31 09:00:00	2014-11-03	1899-12-31 11:00:00	2014-11-03	2	492	46	68	0	0	0	0	0	1.015	1.015	80	80	6	0	0	3.2	0	0	45.9	45.9	9.3	4.9	4.9	-	-	-	-	-	-		-	-	2014-10-30	-	-	-
	246	K	29	157	57	1899-12-31 08:40:00	2014-11-03	1899-12-31 10:45:00	2014-11-03	2	423	58	49	0	0	0	0	0	1.01	1.01	0	0	6	0	0	3.2	0	70	<5,0	5	7.4	<0,7	0.7	-	-	-	-	-	-		-	-	2014-10-09	lactose intolerance	-	-
	247	M	65	178	89	1899-12-31 21:30:00	2014-11-01	1899-12-31 04:30:00	2014-11-02	1	704	123	30	0	0	0	0	0	1.025	1.025	0	0	5.5	0	0	3.2	0	0	9	9	12.2	0.7	0.7	-	-	-	-	-	-		-	-	-	-	-	-
	248	M	58	183	83	1899-12-31 21:30:00	2014-11-03	1899-12-31 06:00:00	2014-11-04	2	618	118	22	0	0	0	0	0	1.025	1.025	0	0	6	0	0	3.2	0	0	<5,0	5	10	<0,5	0.5	-	-	-	-	-	-		-	-	-	-	-	-
	249	K	41	164	67	1899-12-31 22:00:00	2014-11-03	1899-12-31 08:20:00	2014-11-04	2	712	111	47	0	0	0	0	0	>=1,030	1.03	spår-intakt	0	5.5	0	0	3.2	0	15	6.7	6.7	14	0.5	0.5	-	-	-	-	-	-		-	-	2014-10-12	-	-	-
	250	K	44	155	65	1899-12-31 18:00:00	2014-11-04	1899-12-31 18:00:00	2014-11-04	1	125	28	15	0	0	0	0	0	1.01	1.01	80	80	7	0	0	3.2	0	0	<5,0	5	1.4	<3,6	3.6	-	-	-	-	-	-		-	-	2014-11-04	-	-	-
	251	K	52	169	70.5	1899-12-31 19:00:00	2014-11-04	1899-12-31 19:00:00	2014-11-04	1	270	42	14	0	0	0	0	0	1.01	1.01	0	0	5.5	0	0	3.2	0	125	<5,0	5	3.1	<1,6	1.6	-	-	-	-	-	-		-	-	2014-10-30	back pains		-
	252	M	22	178	83	1899-12-31 20:00:00	2014-11-04	1899-12-31 20:00:00	2014-11-04	2	928	234	26	0	0	0	0	0	1.025	1.025	spår-intakt	0	6.5	0	0	3.2	0	0	5.3	5.3	17.6	0.3	0.3	-	-	-	-	-	-		-	-	-	-	-	-
	253	M	40	182	87	1899-12-31 20:00:00	2014-11-03	1899-12-31 08:20:00	2014-11-04	2	657	136	29	0	0	0	0	0	1.02	1.02	0	0	6	0	0	3.2	0	0	<5,0	5	9.8	<0,5	0.5	-	-	-	-	-	-		-	-	-	-	trombyl, metoprolol	-
	254	K	35	166	63	1899-12-31 22:30:00	2014-10-03	1899-12-31 06:15:00	2014-10-04	1	333	58	11	0	0	0	0	0	1.01	1.01	0	0	6	0	0	3.2	0	15	<5,0	5	6.1	<0,8	0.8	-	-	-	-	-	-		-	-	-	-	-	-
	255	M	34	184	80	1899-12-31 22:30:00	2014-11-03	1899-12-31 06:15:00	2014-11-04	3	1159	184	48	0	0	0	0	0	>=1,030	1.03	0	0	6	0.3	0.3	3.2	0	0	37	37	21.4	1.7	1.7	-	-	-	-	-	-		-	-	-	-	-	-
	256	K	27	174	62	1899-12-31 22:00:00	2014-11-04	1899-12-31 03:00:00	2014-11-05	1	-	-	-	0	0	0	0	0	1.015	1.015	0	0	7	0	0	3.2	0	0	<5,0	5	3.8	<1,3	1.3	-	-	-	-	-	-		-	-	2014-10-24	-	-	Na,K,Osmolalitet samma som 257?
	257	M	27	175	90	1899-12-31 22:45:00	2014-11-04	1899-12-31 06:00:00	2014-11-05	2	-	-	-	0	0	0	0	0	>=1,030	1.03	spår-intakt	0	5	0	0	3.2	0	0	14.3	14.3	13	1.1	1.1	-	-	-	-	-	-		-	-			Esidrex, Kaleriod	Na,K,Osmolalitet samma som 256?
	258	K	28	164	58	1899-12-31 09:35:00	2014-11-05	1899-12-31 11:40:00	2014-11-05	3	655	82	81	0	0	0	0	0	1.025	1.025	0	0	5.5	0	0	3.2	0	15	14.7	14.7	12.8	1.1	1.1	-	-	-	-	-	-		-	-	2014-10-27	asthma, allergy (pollen and nuts)	pulmicort, p-piller	-
	259	K	32	173	53	1899-12-31 09:50:00	2014-11-05	1899-12-31 12:10:00	2014-11-14	2	310	44	33	0	0	0	0	0	1.01	1.01	0	0	6	0	0	3.2	0	0	5.3	5.3	6.6	0.8	0.8	-	-	-	-	-	-		-	-	2014-10-09		-	-
	260	M	27	170	93	1899-12-31 20:30:00	2014-11-03	1899-12-31 02:30:00	2014-11-04	2	784	204	28	0	0	0	0	0	1.02	1.02	0	0	7	0	0	16	0	0	<5,0	5	12.2	<0,4	0.4	-	-	-	-	-	-		-	-	-	-	-	-
	261	M	58	180	75	1899-12-31 10:00:00	2014-11-05	1899-12-31 12:15:00	2014-11-05	1	288	54	41	0	0	0	0	0	1.015	1.015	spår-intakt	0	7	0	0	3.2	0	0	<5,0	5	3.2	<1,6	1.6	-	-	-	-	-	-		-	-	-	-		-
	262	K	27	162	51	1899-12-31 09:00:00	2014-11-05	1899-12-31 11:30:00	2014-11-05	1	334	73	24	0	0	0	0	0	1.015	1.015	0	0	7	0	0	3.2	0	0	<5,0	5	5	<1,0	1	-	-	-	-	-	-		-	-	2014-10-21	-	-	-
	263	M	68	180	84	1899-12-31 23:00:00	2014-11-05	1899-12-31 05:00:00	2014-11-06	3	469	93	35	0	0	0	0	0	1.02	1.02	200	200	5.5	1	1	3.2	0	125	205.5	205.5	1.5	137	137	-	-	-	-	-	-		-	-	-	diabetes type 2, hypertension	glibenklamidrecipt, metformin, xatral OD, enalapril, Hiprex	PROV SPÄTT 1:1 URIN/NaCl
	264	K	68	156	70	1899-12-31 22:00:00	2014-11-04	1899-12-31 05:15:00	2014-11-05	2	694	104	51	0	0	0	0	0	1.025	1.025	0	0	5.5	0	0	3.2	0	0	10.5	10.5	8.7	1.2	1.2	-	-	-	-	-	-		-	-	-	hypertension	atendal actavis, normorix mite, simvastatin arrow	-
	265	M	56	-	83	1899-12-31 22:00:00	2014-11-05	1899-12-31 06:00:00	2014-11-06	2	558	82	25	0	0	0	0	0	1.015	1.015	0	0	5.5	0	0	3.2	0	0	19.1	19.1	10.4	1.8	1.8	-	-	-	-	-	-		-	-	-	stroke	tromby, simvastatin	-
	266	K	48	162	61	1899-12-31 22:00:00	2014-11-05	1899-12-31 05:30:00	2014-11-06	2	748	98	31	0	0	0	0	0	1.02	1.02	80	80	6	0	0	3.2	0	15	<5,0	5	10.8	<0,5	0.5	-	-	-	-	-	-		-	-	2014-10-05	-	-	-
	267	M	79	178	90	1899-12-31 15:30:00	2014-11-05	1899-12-31 16:20:00	2014-11-05	2	672	140	55	0	0	0	0	0	>=1,030	1.03	0	0	5.5	0	0	3.2	0	0	6.8	6.8	10.2	0.7	0.7	-	-	-	-	-	-		-	-	-	stroke in 1994	trombyl var 14:e dag	-
	268	K	51	166	85	1899-12-31 21:00:00	2014-11-05	1899-12-31 05:20:00	2014-11-06	2	565	101	27	0	0	0	0	0	1.025	1.025	0	0	6	0	0	3.2	0	0	<5,0	5	7	<0,7	0.7	-	-	-	-	-	-		-	-	-	-	-	-
	269	K	42	167	65	1899-12-31 09:00:00	2014-11-06	1899-12-31 12:30:00	2014-11-06	3	898	151	72	0	0	0	0	0	>=1,030	1.03	0	0	5.5	0	0	3.2	0	0	<5,0	5	13.8	<0,4	0.4	-	-	-	-	-	-		-	-	-	Operation hysterectomy	nasal steroid	-
	270	M	22	177	72.5	1899-12-31 22:00:00	2014-11-05	1899-12-31 06:30:00	2014-11-06	3	795	137	41	0	0	0	0	0	>=1,030	1.03	0	0	5.5	0	0	3.2	0	70	8.9	8.9	20.9	0.4	0.4	-	-	-	-	-	-		-	-	-	-	-	-
	271	K	45	166	73	1899-12-31 11:00:00	2014-11-05	1899-12-31 06:30:00	2014-11-06	1	168	33	3	0	0	0	0	0	<=1,005	1.005	0	0	6	0	0	3.2	0	0	<5,0	5	2.5	<2,1	2.1	-	-	-	-	-	-		-	-	2014-10-13	-	-	-
	272	K	-	154	63	1899-12-31 06:45:00	2014-11-07	1899-12-31 09:15:00	2014-11-07	2	304	34	38	0	0	0	0	0	1.01	1.01	spår-intakt	0	5.5	0	0	3.2	0	500	<5,0	5	3.8	<1,3	1.3	-	-	-	-	-	-		-	-	2014-10-23	-	-	-
	273	M	33	184	88	1899-12-31 21:15:00	2014-11-06	1899-12-31 22:00:00	2014-11-06	4	1033	162	45	0	0	0	0	0	>=1,030	1.03	0	0	5.5	spår	0	3.2	0	0	32.8	32.8	23.8	1.4	1.4	-	-	-	-	-	-		-	-	-	ADHD	concerta, lamictal	-
	274	K	31	168	92	1899-12-31 22:00:00	2014-11-06	1899-12-31 06:00:00	2014-11-07	6	948	90	49	0	0	0	0	0	>=1,030	1.03	200	200	6	0.3	0.3	3.2	0	0	56.2	56.2	18.9	3	3	-	-	-	-	-	-		-	-	ongoing	-	-	-
	275	M	33	185	85	1899-12-31 23:00:00	2014-11-06	1899-12-31 06:00:00	2014-11-07	3	1035	162	45	0	0	0	0	0	>=1,030	1.03	0	0	5.5	0	0	3.2	0	0	31.7	31.7	24.6	1.3	1.3	-	-	-	-	-	-		-	-	-	-	-	-
	276	K	54	166	75	1899-12-31 19:00:00	2014-11-06	1899-12-31 19:30:00	2014-11-06	4	936	90	49	0	0	0	Spår	0	>=1,030	1.03	200	200	6	0.3	0.3	3.2	0	0	59.6	59.6	20.1	3	3	-	-	-	-	-	-		-	-	-	-	psoriasis artrit	-
	277	M	38	172	62	1899-12-31 10:00:00	2014-11-12	1899-12-31 10:00:00	2014-11-12	2	575	123	65	0	0	0	0	0	1.02	1.02	0	0	7	0	0	3.2	0	0	<5,0	5	6.9	<0,7	0.7	-	-	-	-	-	-		-	-	-	-	-	-
	278	M	15	170	61	1899-12-31 20:00:00	2014-11-11	1899-12-31 20:00:00	2014-11-11	2	975	119	99	0	0	0	0	0	1.02	1.02	0	0	7	0.3	0.3	3.2	0	0	29.5	29.5	26.4	1.1	1.1	-	-	-	-	-	-		-	-	-	-	-	-
	279	M	47	187	97	1899-12-31 20:00:00	2014-11-11	1899-12-31 20:00:00	2014-11-11	3	915	121	97	0	0	0	0	0	1.025	1.025	0	0	5.5	0	0	3.2	0	0	8	8	13.5	0.6	0.6	-	-	-	-	-	-		-	-	-	-	-	-
	280	K	36	165	72	1899-12-31 20:00:00	2014-11-12	1899-12-31 20:00:00	2014-11-12	-	654	146	68	0	0	0	0	0	1.025	1.025	25	25	6	0	0	3.2	0	0	16.2	16.2	15.7	1	1	-	-	-	-	-	-		-	-	-	-	-	-
	281	M	40	181	97	1899-12-31 20:30:00	2014-11-13	1899-12-31 06:00:00	2014-11-14	2	556	130	27	0	0	0	0	0	1.02	1.02	0	0	6	0	0	3.2	0	0	<5,0	5	10.4	<0,5	0.5	-	-	-	-	-	-		-	-	-	-	-	-
	282	K	-	176	63	1899-12-31 19:00:00	2014-11-12	1899-12-31 07:00:00	2014-11-13	2	353	57	27	0	0	0	0	0	1.015	1.015	spår-intakt	0	7	0	0	3.2	0	0	52.7	52.7	5.8	9.1	9.1	-	-	-	-	-	-		-	-	-	hip arthrosis	Vtamin B12	-
	283	K	-	158	63.5	1899-12-31 08:00:00	2014-11-14	1899-12-31 09:30:00	2014-11-14	1	423	76	43	0	0	0	0	0	1.01	1.01	spår-intakt	0	6	0	0	3.2	0	0	<5,0	<5,0	5.8	<0,9	0.9	-	-	-	-	-	-		-	-	-	-	oral contraceptive pill	-
	284	K	52	159	72	1899-12-31 07:00:00	2014-11-14	1899-12-31 09:45:00	2014-11-14	2	935	82	100	0	0	0	0	0	1.025	1.025	spår-intakt	0	5	0	0	3.2	0	0	7	7	13.1	0.5	0.5	-	-	-	-	-	-		-	-	-	IBS (unspecific gut problems)	-	allergi
	285	M	51	180	79	1899-12-31 22:10:00	2014-11-13	1899-12-31 05:50:00	2014-11-14	2	663	74	25	0	0	0	0	0	1.025	1.025	0	0	5.5	0	0	3.2	0	0	<5,0	5	10.1	<0,5	0.5	-	-	-	-	-	-		-	-	-	-		-
	286	M	56	168	105	1899-12-31 23:00:00	2014-11-15	1899-12-31 08:00:00	2014-11-16	1	402	144	17	0	0	0	0	0	1.02	1.02	spår-intakt	0	7	0	0	3.2	0	0	<5,0	5	3.4	<1,5	1.5	-	-	-	-	-	-		-	-	-	"heart problems"	simvastatin, trombyl, metoprolol sandoz, naproxen	-
	287	K	69	167	68	1899-12-31 17:30:00	2014-11-16	1899-12-31 21:15:00	2014-11-16	2	754	23	55	0	0	0	0	0	1.015	1.015	0	0	5.5	0	0	3.2	0	0	<5,0	5	9.4	<0,5	0.5	-	-	-	-	-	-		-	-	None	-	vagifem	-
	288	K	45	159	60	1899-12-31 22:00:00	2014-11-17	1899-12-31 08:30:00	2014-11-18	2	902	147	66	0	0	0	0	0	1.025	1.025	80	80	5.5	0	0	3.2	0	0	11.6	11.6	15.4	0.8	0.8	-	-	-	-	-	-		-	-	2014-10-28	-	-	-
	289	K	-	167	63	1899-12-31 16:00:00	2014-11-18	1899-12-31 18:00:00	2014-11-18	3	433	96	39	0	0	0	0	0	1.015	1.015	200	200	7	0	0	3.2	0	0	7	7	6.4	1.1	1.1	-	-	-	-	-	-		-	-	2014-11-11	-	-	-
	290	M	18	182	74	1899-12-31 12:30:00	2014-11-19	1899-12-31 18:15:00	2014-11-19	2	990	224	84	0	0	0	0	0	1.025	1.025	0	0	6	0	0	3.2	0	0	<5,0	5	10.2	<0,5	0.5	-	-	-	-	-	-		-	-	-	-	-	-
	291	K	47	176	76	1899-12-31 21:00:00	2014-11-19	1899-12-31 05:45:00	2014-11-20	1	1035	162	105	0	0	0	0	0	>=1,030	1.03	0	0	5.5	0	0	3.2	0	0	8.3	8.3	20.7	0.4	0.4	-	-	-	-	-	-		-	-	2014-10-27	-	-	-
	292	M	46	185	75	1899-12-31 15:00:00	2014-11-19	1899-12-31 18:25:00	2014-11-19	3	769	132	80	0	0	0	0	0	1.02	1.02	0	0	6.5	0	0	3.2	0	0	6.8	6.8	15.3	0.4	0.4	-	-	-	-	-	-		-	-	-	-	-	-
	293	K	53	156	56	1899-12-31 21:00:00	2014-11-20	1899-12-31 06:00:00	2014-11-21	1	481	111	12	0	0	0	0	0	1.02	1.02	0	0	5.5	0	0	3.2	0	15	<5,0	5	6.6	<0,8	0.8	-	-	-	-	-	-		-	-	-	-	-	-
	294	M	55	170	70	1899-12-31 21:00:00	2014-11-20	1899-12-31 06:30:00	2014-11-21	3	1000	159	84	0	0	0	0	0	>=1,030	1.03	0	0	5.5	0	0	3.2	0	0	21.7	21.7	20.9	1	1	-	-	-	-	-	-		-	-	-		-	-
	295	M	66	188	81	1899-12-31 20:15:00	2014-11-20	1899-12-31 22:15:00	2014-11-20	2	478	62	48	0	0	0	0	0	1.02	1.02	0	0	6.5	0	0	3.2	0	0	<5,0	5	7.3	<0,7	0.7	-	-	-	-	-	-		-	-	-	Myocardial infarction 20013, stroke 2008	-	-
	296	K	-	163	115	1899-12-31 19:00:00	2014-11-20	1899-12-31 22:00:00	2014-11-20	1	341	36	22	0	0	0	0	0	1.01	1.01	0	0	6	0	0	3.2	0	0	<5,0	5	4.9	<1,0	1	-	-	-	-	-	-		-	-	-	Hypertension, diabetes	penicillin, drug for hypertension	-
	297	K	52	150	57	1899-12-31	2014-11-20	1899-12-31 09:00:00	2014-11-21	5	860	44	133	0	0	0	0	0	>=1,030	1.03	0	0	5	0	0	3.2	0	0	10.6	10.6	18.8	0.6	0.6	-	-	-	-	-	-		-	-	2014-11-15	-	-	-
	298	K	30	165	52	1899-12-31 06:00:00	2014-11-24	1899-12-31 09:00:00	2014-11-24	2	417	50	30	0	0	0	0	0	1.015	1.015	0	0	6.5	0	0	3.2	0	125	<5,0	5	4.8	<1,0	1	-	-	-	-	-	-		-	-	-	-	-	-
	299	K	19	162	70	1899-12-31 22:40:00	2014-11-27	1899-12-31 05:30:00	2014-11-28	3	920	141	43	0	0	0	0	0	>=1,030	1.03	0	0	6	0	0	3.2	0	0	7	7	20.7	0.3	0.3	-	-	-	-	-	-		-	-	2014-11-06	-	oral contraceptive pill	-
	300	M	48	178	105	1899-12-31 20:30:00	2014-11-27	1899-12-31 22:30:00	2014-11-27	3	1011	60	122	0	0	0	Spår	0	>=1,030	1.03	0	0	5	0	0	3.2	0	0	30.7	30.7	23.4	1.3	1.3	-	-	-	-	-	-		-	-	-	-	antihypertensive drug	-
	Nr	Gender (M=male)	Age	Length(cm)	Body weight (kg)	Last water intake (h)	Last water intake (day)	Urine sample delivered (h)	Urine sample delivered (day)	Urine color	U-osmolality	U-sodium	U-potassium	U-glucose	U-bilirubin	Corrected U-bilirubin	Ketones (mmol/L)	Reported ketones (mmol/L)	U-specific gravity	Reported U-spec gravity	Blood Ery/microL	Reportede Blood Ery/microL	pH	Protein g/L	Protein g/L	Urobilinogen µmol/L	Nitrite	Leucocytes	Albumin mg/L	Reported albumin mg/L	Creatinine mmol/L	Albumin/creatinine ratio mg/mmol	Reported albumin/creatinine ratio	Serum osmolality (mosmol/kg)	Plasma sodium	Plasma potassium	Plasma calcium	Serum cortisol (nmol/L)	Serum vasopressin (pg/ml)	Reported serum vasopressin	Serum aldosterone	Serum renin	First day of last menstruation (day)	Diseases (morbidity)	Drugs	Övrigt

## Sheet: prov till lab
		U500 study
		Scheme for delivery of samples to the Clinical Chemistry Laboratory
		Day	Number of samples to laboratory
	October 2014	20	35
		21	2
		22	26
		23	30
		24	15
		27	6
		28	15
		29	22
		30	20
		31	28
	2014-11-01	3	9
		4	2
		5	14
		6	10
		7	5
		13	4
		14	5
